# Supplementary material for: Profiling of remote skeletal muscle gene changes resulting from stimulation of atopic dermatitis disease in NC/Nga mouse model
Source: PubMed Central journal article supplement — Korean J Physiol Pharmacol. 2019 Aug 26;23(5):367–79. doi: 10.4196/kjpp.2019.23.5.367 (PMC6717787; doi:10.4196/kjpp.2019.23.5.367), 2019-08-26
Supplement: kjpp-23-367-s001.pdf [file kjpp-23-367-s001.pdf]

**Supplementary Table 1. The significant differentially expressed genes in response to atopic dermatitis (AD) based on the microarray analysis ( $p < 0.05$ )**

| Gene symbol         | Gene description                                                     | Fold-change | p-value |
|---------------------|----------------------------------------------------------------------|-------------|---------|
| <i>Ptprc</i>        | Protein tyrosine phosphatase, receptor type, c                       | 14.904024   | 0       |
| <i>Cr2</i>          | Complement receptor 2                                                | 9.269651    | 0       |
| <i>Myh2</i>         | Myosin, heavy polypeptide 2, skeletal muscle, adult                  | 5.214414    | 0       |
| <i>Igh-V3609N</i>   | Immunoglobulin heavy chain (v3609n non-productive)                   | 37.175365   | 0       |
| <i>Igh-VX24</i>     | Immunoglobulin heavy chain (x24 family)                              | 14.296995   | 0       |
| <i>Ighv3-2</i>      | Immunoglobulin heavy variable 3-2                                    | 11.854764   | 0       |
| <i>Ighv1-34</i>     | Immunoglobulin heavy variable 1-34                                   | 11.746874   | 0       |
| <i>Ighv1-62-1</i>   | Immunoglobulin heavy variable 1-62-1                                 | 7.392181    | 0       |
| <i>Tnncl</i>        | Troponin c, cardiac/slow skeletal                                    | 11.283909   | 0       |
| <i>Trac</i>         | T cell receptor alpha constant                                       | 11.119307   | 0       |
| <i>Myh7</i>         | Myosin, heavy polypeptide 7, cardiac muscle, beta                    | 25.337723   | 0       |
| <i>Apol7c</i>       | Apolipoprotein L 7c                                                  | 12.159820   | 0       |
| <i>Glycam1</i>      | Glycosylation dependent cell adhesion molecule 1                     | 35.427801   | 0       |
| <i>Ankrd2</i>       | Ankyrin repeat domain 2 (stretch responsive muscle)                  | 7.473013    | 0       |
| <i>Ms4a1</i>        | Membrane-spanning 4-domains, subfamily A, member 1                   | 8.695355    | 0       |
| <i>Cd53</i>         | CD53 antigen                                                         | 10.468298   | 0       |
| <i>Myoz2</i>        | Myozenin 2                                                           | 7.686757    | 0       |
| <i>Bank1</i>        | B cell scaffold protein with ankyrin repeats 1                       | 6.687630    | 0       |
| <i>Gm13304</i>      | Predicted gene 13304                                                 | 7.324321    | 0       |
| <i>Gm13304</i>      | Predicted gene 13304                                                 | 7.324321    | 0       |
| <i>Gm13304</i>      | Predicted gene 13304                                                 | 7.183739    | 0       |
| <i>Gm13304</i>      | Predicted gene 13304                                                 | 7.324321    | 0       |
| <i>Gm1987</i>       | Predicted gene 1987                                                  | 7.250950    | 0       |
| <i>LOC100041504</i> | C-C motif chemokine 21c                                              | 6.578415    | 0       |
| <i>Gm13304</i>      | Predicted gene 13304                                                 | 7.324321    | 0       |
| <i>Gm13304</i>      | Predicted gene 13304                                                 | 7.183739    | 0       |
| <i>Gm1987</i>       | Predicted gene 1987                                                  | 8.018598    | 0       |
| <i>Cxcl13</i>       | Chemokine (C-X-C motif) ligand 13                                    | 9.521342    | 0       |
| <i>Tecrl</i>        | Trans-2,3-enoyl-coa reductase-like                                   | 9.324394    | 0       |
| <i>Atp2a2</i>       | ATPase, Ca <sup>++</sup> transporting, cardiac muscle, slow twitch 2 | 8.327278    | 0       |
| <i>Igkv1-135</i>    | Immunoglobulin kappa variable 1-135                                  | 10.058547   | 0       |
| <i>Igkv6-17</i>     | Immunoglobulin kappa variable 6-17                                   | 18.744884   | 0       |
| <i>Igkv3-12</i>     | Immunoglobulin kappa variable 3-12                                   | 10.420662   | 0       |
| <i>Igkv3-7</i>      | Immunoglobulin kappa variable 3-7                                    | 10.975806   | 0       |

|                   |                                                            |           |             |
|-------------------|------------------------------------------------------------|-----------|-------------|
| <i>Igkj1</i>      | Immunoglobulin kappa joining 1                             | 14.631543 | 0           |
| <i>Igk-V21</i>    | Immunoglobulin kappa chain variable 21 (V21)               | 6.750012  | 0           |
| <i>Igkv6-23</i>   | Immunoglobulin kappa variable 6-23                         | 15.888819 | 0           |
| <i>Igkv10-96</i>  | Immunoglobulin kappa variable 10-96                        | 16.205201 | 0           |
| <i>Igkv4-72</i>   | Immunoglobulin kappa chain variable 4-72                   | 12.974032 | 0           |
| <i>Igkv4-70</i>   | Immunoglobulin kappa chain variable 4-70                   | 18.687932 | 0           |
| <i>Igkv4-62</i>   | Immunoglobulin kappa variable 4-62                         | 7.552373  | 0           |
| <i>Igkv4-57-1</i> | Immunoglobulin kappa variable 4-57-1                       | 16.235839 | 0           |
| <i>Igkv5-48</i>   | Immunoglobulin kappa variable 5-48                         | 19.271941 | 0           |
| <i>Csrp3</i>      | Cysteine and glycine-rich protein 3                        | 15.609420 | 0           |
| <i>Sln</i>        | Sarcolipin                                                 | 8.089946  | 0           |
| <i>Cd3g</i>       | CD3 antigen, gamma polypeptide                             | 12.840638 | 0           |
| <i>Sell</i>       | Selectin, lymphocyte                                       | 8.134169  | 1.91259E-13 |
| <i>Il2rg</i>      | Interleukin 2 receptor, gamma chain                        | 6.883322  | 1.91259E-13 |
| <i>Ctss</i>       | Cathepsin S                                                | 6.263244  | 3.60017E-13 |
| <i>Jchain</i>     | Immunoglobulin joining chain                               | 8.232525  | 3.60017E-13 |
| <i>Timd4</i>      | T cell immunoglobulin and mucin domain containing 4        | 7.174956  | 5.2964E-13  |
| <i>Igkv6-13</i>   | Immunoglobulin kappa variable 6-13                         | 8.012570  | 1.55894E-12 |
| <i>Lmod2</i>      | Leiomodin 2 (cardiac)                                      | 4.899943  | 2.0401E-12  |
| <i>Igk-V1</i>     | Immunoglobulin kappa chain variable 1 (V1)                 | 7.993681  | 2.13117E-12 |
| <i>Cd4</i>        | CD4 antigen                                                | 7.546538  | 2.13117E-12 |
| <i>Il7r</i>       | Interleukin 7 receptor                                     | 7.950139  | 3.06014E-12 |
| <i>Tnnt1</i>      | Troponin T1, skeletal, slow                                | 5.871320  | 3.32395E-12 |
| <i>Pyhin1</i>     | Pyrin and HIN domain family, member 1                      | 7.756684  | 5.96728E-12 |
| <i>Iglv2</i>      | Immunoglobulin lambda variable 2                           | 7.651804  | 6.17046E-12 |
| <i>Tcrb-J</i>     | T cell receptor beta, joining region                       | 5.278160  | 1.31784E-11 |
| <i>Csn1s1</i>     | Casein alpha s1                                            | -7.652706 | 2.26399E-11 |
| <i>H2-Ea-ps</i>   | Histocompatibility 2, class II antigen E alpha, pseudogene | 4.982432  | 2.5564E-11  |
| <i>Igkv4-68</i>   | Immunoglobulin kappa variable 4-68                         | 6.247916  | 3.63044E-11 |
| <i>Igkv6-14</i>   | Immunoglobulin kappa variable 6-14                         | 8.324335  | 6.26188E-11 |
| <i>Csn2</i>       | Casein beta                                                | -7.331127 | 7.34889E-11 |
| <i>Ighv9-2</i>    | Immunoglobulin heavy variable V9-2                         | 7.341882  | 7.98299E-11 |
| <i>Ms4a6b</i>     | Membrane-spanning 4-domains, subfamily A, member 6B        | 7.197196  | 1.07542E-10 |
| <i>Igkv19-93</i>  | Immunoglobulin kappa chain variable 19-93                  | 6.199621  | 1.66024E-10 |
| <i>Tnni1</i>      | Troponin I, skeletal, slow 1                               | 5.503445  | 3.53957E-10 |
| <i>Myl3</i>       | Myosin, light polypeptide 3                                | 5.701751  | 4.96498E-10 |
| <i>Cd209b</i>     | CD209b antigen                                             | 5.034680  | 7.14709E-10 |
| <i>Igh-V7183</i>  | Immunoglobulin heavy chain (v7183 family)                  | 4.423643  | 1.26823E-09 |

|                     |                                                  |          |             |
|---------------------|--------------------------------------------------|----------|-------------|
| <i>Stk17b</i>       | Serine/threonine kinase 17b (apoptosis-inducing) | 4.588190 | 1.61325E-09 |
| <i>Cd52</i>         | CD52 antigen                                     | 6.049832 | 1.64447E-09 |
| <i>Ly86</i>         | Lymphocyte antigen 86                            | 5.631171 | 2.60724E-09 |
| <i>Dock10</i>       | Dedicator of cytokinesis 10                      | 4.793701 | 3.78062E-09 |
| <i>Gm8995</i>       | Predicted gene 8995                              | 5.256454 | 4.04914E-09 |
| <i>Ighg</i>         | Immunoglobulin heavy chain (gamma polypeptide)   | 5.338132 | 1.16695E-08 |
| <i>Egln3</i>        | Egl-9 family hypoxia-inducible factor 3          | 4.062182 | 1.19759E-08 |
| <i>Traj35</i>       | T cell receptor alpha joining 35                 | 6.705570 | 1.24724E-08 |
| <i>Mybpc1</i>       | Myosin binding protein c, slow-type              | 2.901020 | 1.25686E-08 |
| <i>Slfn2</i>        | Schlafen 2                                       | 4.487121 | 1.41127E-08 |
| <i>Lcp1</i>         | Lymphocyte cytosolic protein 1                   | 4.184079 | 2.97426E-08 |
| <i>Myom3</i>        | Myomesin family, member 3                        | 4.359900 | 3.44233E-08 |
| <i>Epsti1</i>       | Epithelial stromal interaction 1 (breast)        | 4.864798 | 3.85288E-08 |
| <i>Selplg</i>       | Selectin, platelet (p-selectin) ligand           | 4.860636 | 4.06416E-08 |
| <i>Smtnl1</i>       | Smoothelin-like 1                                | 3.995871 | 5.26356E-08 |
| <i>Tpm3</i>         | Tropomyosin 3, gamma                             | 4.086413 | 8.07949E-08 |
| <i>Prkcb</i>        | Protein kinase c, beta                           | 4.793967 | 8.43315E-08 |
| <i>Rnu3a</i>        | U3A small nuclear RNA                            | 3.675371 | 1.90929E-07 |
| <i>Ighv1-75</i>     | Immunoglobulin heavy variable 1-75               | 4.139883 | 2.35356E-07 |
| <i>Pax5</i>         | Paired box 5                                     | 4.831680 | 3.18778E-07 |
| <i>Igkv4-86</i>     | Immunoglobulin kappa variable 4-86               | 4.246679 | 4.38824E-07 |
| <i>Ccl5</i>         | Chemokine (C-C motif) ligand 5                   | 3.784414 | 4.82844E-07 |
| <i>Ighv1-62-2</i>   | Immunoglobulin heavy variable 1-62-2             | 4.397474 | 4.84557E-07 |
| <i>Ighv1-71</i>     | Immunoglobulin heavy variable 1-71               | 4.397474 | 4.84557E-07 |
| <i>Traj40</i>       | T cell receptor alpha joining 40                 | 6.083957 | 5.07824E-07 |
| <i>Bin2</i>         | Bridging integrator 2                            | 4.498675 | 7.82775E-07 |
| <i>Cybb</i>         | Cytochrome b-245, beta polypeptide               | 3.860613 | 8.36122E-07 |
| <i>Igkj3</i>        | Immunoglobulin kappa joining 3                   | 4.200977 | 9.03313E-07 |
| <i>Casq2</i>        | Calsequestrin 2                                  | 3.742455 | 1.09762E-06 |
| <i>Iglv1</i>        | Immunoglobulin lambda variable 1                 | 4.595462 | 1.58174E-06 |
| <i>LOC101055672</i> | Nuclear body protein SP140-like                  | 3.820298 | 1.62019E-06 |
| <i>Aspn</i>         | Asporin                                          | 3.594734 | 1.80859E-06 |
| <i>LOC102633783</i> | Sp110 nuclear body protein-like                  | 3.957996 | 1.88054E-06 |
| <i>Lyz1</i>         | Lysozyme 1                                       | 3.689218 | 2.53437E-06 |
| <i>Arhgap15</i>     | Rho GTPase activating protein 15                 | 4.197892 | 2.65577E-06 |
| <i>Rnu3b1</i>       | U3B small nuclear RNA 1                          | 2.943474 | 3.12093E-06 |

|                   |                                                                          |           |             |
|-------------------|--------------------------------------------------------------------------|-----------|-------------|
| <i>Rnu3b1</i>     | U3B small nuclear RNA 1                                                  | 2.943474  | 3.12093E-06 |
| <i>Rnu3b4</i>     | U3B small nuclear RNA 4                                                  | 2.943474  | 3.12093E-06 |
| <i>Rnu3b4</i>     | U3B small nuclear RNA 4                                                  | 2.943474  | 3.12093E-06 |
| <i>Igkv1-117</i>  | Immunoglobulin kappa variable 1-117                                      | 4.924544  | 3.13745E-06 |
| <i>Lilrb4a</i>    | Leukocyte immunoglobulin-like receptor, subfamily B, member 4A           | 4.048956  | 3.20735E-06 |
| <i>Cd22</i>       | CD22 antigen                                                             | 4.356516  | 3.20735E-06 |
| <i>Fcμr</i>       | Fc fragment of IgM receptor                                              | 4.248151  | 3.72714E-06 |
| <i>Ctse</i>       | Cathepsin e                                                              | 3.722766  | 3.93616E-06 |
| <i>Dock2</i>      | Dedicator of cyto-kinesis 2                                              | 3.698615  | 4.06357E-06 |
| <i>Sp100</i>      | Nuclear antigen Sp100                                                    | 3.476896  | 5.93746E-06 |
| <i>Cd79a</i>      | CD79A antigen (immunoglobulin-associated alpha)                          | 3.830705  | 6.00136E-06 |
| <i>Mybph</i>      | Myosin binding protein H                                                 | -3.001139 | 6.62407E-06 |
| <i>Ikzfl</i>      | IKAROS family zinc finger 1                                              | 4.316494  | 6.71261E-06 |
| <i>Igkv4-59</i>   | Immunoglobulin kappa variable 4-59                                       | 5.134593  | 7.04713E-06 |
| <i>Agbl1</i>      | ATP/GTP binding protein-like 1                                           | 3.555864  | 7.04713E-06 |
| <i>Traj21</i>     | T cell receptor alpha joining 21                                         | 4.012677  | 7.15757E-06 |
| <i>Actc1</i>      | Actin, alpha, cardiac muscle 1                                           | -2.702651 | 7.15757E-06 |
| <i>Lbh</i>        | Limb-bud and heart                                                       | 3.365440  | 8.28182E-06 |
| <i>Mpeg1</i>      | Macrophage expressed gene 1                                              | 3.577967  | 8.91416E-06 |
| <i>Igkv4-50</i>   | Immunoglobulin kappa variable 4-50                                       | 4.836053  | 9.4246E-06  |
| <i>Atp1b1</i>     | ATPase, Na <sup>+</sup> /K <sup>+</sup> transporting, beta 1 polypeptide | 3.017942  | 1.01881E-05 |
| <i>H2-M2</i>      | Histocompatibility 2, m region locus 2                                   | 4.329454  | 1.07827E-05 |
| <i>Cmah</i>       | Cytidine monophospho-n-acetylneuraminic acid hydroxylase                 | 3.766801  | 1.11673E-05 |
| <i>Ikzf3</i>      | IKAROS family zinc finger 3                                              | 4.393939  | 1.131E-05   |
| <i>Ralgps2</i>    | Ral GEF with PH domain and SH3 binding motif 2                           | 3.866063  | 1.21918E-05 |
| <i>Igkv4-55</i>   | Immunoglobulin kappa variable 4-55                                       | 3.617229  | 1.35831E-05 |
| <i>Igh-VJ558</i>  | Immunoglobulin heavy chain (J558 family)                                 | 4.327954  | 1.59541E-05 |
| <i>Gm24411</i>    | Predicted gene, 24411 [Source:MGI Symbol;Acc:MGI:5454188]                | 3.536678  | 1.7598E-05  |
| <i>Igkv10-94</i>  | Immunoglobulin kappa variable 10-94                                      | 4.260507  | 1.95558E-05 |
| <i>Actn2</i>      | Actinin alpha 2                                                          | 2.493989  | 2.06104E-05 |
| <i>Cd180</i>      | CD180 antigen                                                            | 4.626464  | 2.20686E-05 |
| <i>Ugcg</i>       | UDP-glucose ceramide glucosyltransferase                                 | 3.429754  | 2.20686E-05 |
| <i>Lyz2</i>       | Lysozyme 2                                                               | 3.057866  | 2.4385E-05  |
| <i>Ighv2-9</i>    | Immunoglobulin heavy variable 2-9                                        | 3.281249  | 2.9176E-05  |
| <i>Ighv1-62-3</i> | Immunoglobulin heavy variable 1-62-3                                     | 3.879713  | 3.12877E-05 |
| <i>Gm10717</i>    | Predicted gene 10717 [Source:MGI                                         | -3.067450 | 3.26443E-05 |

|                                 |                                                               |           |             |
|---------------------------------|---------------------------------------------------------------|-----------|-------------|
|                                 | Symbol;Acc:MGI:3642031]                                       |           |             |
| <i>Ltb</i>                      | Lymphotoxin b                                                 | 3.352646  | 3.66469E-05 |
| <i>Itgb2</i>                    | Integrin beta 2                                               | 3.275341  | 3.75636E-05 |
| <i>Igkv4-73</i>                 | Immunoglobulin kappa variable 4-73                            | 3.521268  | 4.11459E-05 |
| <i>Lgi1</i>                     | Leucine-rich repeat lgi family, member 1                      | 4.068198  | 4.34605E-05 |
| <i>P2ry10</i>                   | Purinergic receptor p2y, g-protein coupled 10                 | 4.712475  | 4.36156E-05 |
| <i>Gm24119</i>                  | Predicted gene, 24119 [source:mgi symbol;acc:mgi:5453896]     | 2.975052  | 4.79831E-05 |
| <i>Ptpn22</i>                   | Protein tyrosine phosphatase, non-receptor type 22 (lymphoid) | 4.013887  | 4.79831E-05 |
| <i>Ighv1-69</i>                 | Immunoglobulin heavy variable 1-69                            | 4.604007  | 4.84353E-05 |
| <i>Pip4k2a</i>                  | Phosphatidylinositol-5-phosphate 4-kinase, type II, alpha     | 3.246961  | 4.87833E-05 |
| <i>Nckap11</i>                  | NCK associated protein 1 like                                 | 3.319015  | 5.04094E-05 |
| <i>Ptpn6</i>                    | Protein tyrosine phosphatase, non-receptor type 6             | 3.204957  | 5.88237E-05 |
| <i>2310075C17</i><br><i>Rik</i> | RIKEN cDNA 2310075C17 gene                                    | 2.996244  | 6.34617E-05 |
| <i>Gm23444</i>                  | Predicted gene, 23444 [Source:MGI Symbol;Acc:MGI:5453221]     | 2.415221  | 7.79215E-05 |
| <i>Gm24497</i>                  | Predicted gene, 24497 [Source:MGI Symbol;Acc:MGI:5454274]     | 2.415221  | 7.79215E-05 |
| <i>Gm25939</i>                  | Predicted gene, 25939 [Source:MGI Symbol;Acc:MGI:5455716]     | 2.415221  | 7.79215E-05 |
| <i>Gm23444</i>                  | Predicted gene, 23444 [Source:MGI Symbol;Acc:MGI:5453221]     | 2.415221  | 7.79215E-05 |
| <i>Gm10719</i>                  | Predicted gene 10719 [Source:MGI Symbol;Acc:MGI:3641690]      | -2.964225 | 7.79215E-05 |
| <i>Traj12</i>                   | T cell receptor alpha joining 12                              | 3.441697  | 7.89626E-05 |
| <i>Snord13</i>                  | Small nucleolar RNA, C/D box 13                               | 2.759410  | 9.10405E-05 |
| <i>LOC100041034</i>             | Sp110 nuclear body protein pseudogene                         | 3.049790  | 9.77277E-05 |
| <i>Fcgbp</i>                    | Fc fragment of IgG binding protein                            | -3.615312 | 9.98493E-05 |
| <i>Lcp2</i>                     | Lymphocyte cytosolic protein 2                                | 3.075050  | 0.000100617 |
| <i>Rnu12</i>                    | RNA U12, small nuclear                                        | 2.843770  | 0.000104358 |
| <i>Klhl6</i>                    | Kelch-like 6                                                  | 3.495927  | 0.000112613 |
| <i>Ankrd1</i>                   | Ankyrin repeat domain 1 (cardiac muscle)                      | 2.872695  | 0.000122828 |
| <i>Cd74</i>                     | CD74 antigen                                                  | 2.826957  | 0.000130769 |
| <i>Ighv1-7</i>                  | Immunoglobulin heavy variable V1-7                            | 3.206801  | 0.000133321 |
| <i>Pck1</i>                     | Phosphoenolpyruvate carboxykinase 1, cytosolic                | -2.849344 | 0.000149194 |
| <i>Ighm</i>                     | Immunoglobulin heavy constant mu                              | 4.420838  | 0.000152748 |

|                     |                                                                       |           |             |
|---------------------|-----------------------------------------------------------------------|-----------|-------------|
| <i>Gm25360</i>      | Predicted gene, 25360 [Source:MGI Symbol;Acc:MGI:5455137]             | 2.381078  | 0.000194401 |
| <i>Ccl22</i>        | Chemokine (C-C motif) ligand 22                                       | 3.350961  | 0.000217941 |
| <i>Taf1d</i>        | TATA box binding protein (Tbp)-associated factor, RNA polymerase I, D | 2.917272  | 0.00022316  |
| <i>Cd79b</i>        | CD79B antigen                                                         | 3.397656  | 0.000261267 |
| <i>Gm25813</i>      | Predicted gene, 25813 [Source:MGI Symbol;Acc:MGI:5455590]             | 2.511858  | 0.000261267 |
| <i>Gm23927</i>      | Predicted gene, 23927 [Source:MGI Symbol;Acc:MGI:5453704]             | 2.771314  | 0.000269543 |
| <i>Kctd12</i>       | Potassium channel tetramerisation domain containing 12                | 2.919315  | 0.00027062  |
| <i>LOC102636558</i> | Component of Sp100-rs-like                                            | 3.322214  | 0.000275081 |
| <i>Hspb7</i>        | Heat shock protein family, member 7 (cardiovascular)                  | 2.676810  | 0.000321287 |
| <i>Traj38</i>       | T cell receptor alpha joining 38                                      | 3.641670  | 0.000322536 |
| <i>Iglv3</i>        | Immunoglobulin lambda variable 3                                      | 3.908649  | 0.000332243 |
| <i>Trbj1-1</i>      | T cell receptor beta joining 1-1                                      | 3.891955  | 0.000347005 |
| <i>Muc15</i>        | Mucin 15                                                              | -3.774315 | 0.000352101 |
| <i>Csn3</i>         | Casein kappa                                                          | -3.708305 | 0.000352101 |
| <i>Igkv12-46</i>    | Immunoglobulin kappa variable 12-46                                   | 3.499551  | 0.00040599  |
| <i>Gm10719</i>      | Predicted gene 10719 [Source:MGI Symbol;Acc:MGI:3641690]              | -3.235211 | 0.00041192  |
| <i>Stap1</i>        | Signal transducing adaptor family member 1                            | 3.754589  | 0.000431204 |
| <i>Art2b</i>        | ADP-ribosyltransferase 2b                                             | 4.133389  | 0.000436275 |
| <i>Itgal</i>        | Integrin alpha L                                                      | 3.076969  | 0.000441262 |
| <i>Igkv8-24</i>     | Immunoglobulin kappa chain variable 8-24                              | 4.110603  | 0.000540103 |
| <i>Gm9800</i>       | Predicted gene 9800 [Source:MGI Symbol;Acc:MGI:3710580]               | 2.606294  | 0.00054366  |
| <i>Cpa3</i>         | Carboxypeptidase A3, mast cell                                        | 2.769480  | 0.00054366  |
| <i>Snora3</i>       | Small nucleolar RNA, H/ACA box 3                                      | 2.565402  | 0.000596982 |
| <i>H2-DMb2</i>      | Histocompatibility 2, class II, locus Mb2                             | 3.155919  | 0.000690586 |
| <i>Traj27</i>       | T cell receptor alpha joining 27                                      | 3.768081  | 0.000724914 |
| <i>Cdh4</i>         | Cadherin 4                                                            | -2.643226 | 0.000769449 |
| <i>Ighm</i>         | Immunoglobulin heavy constant mu                                      | 2.609150  | 0.000803644 |
| <i>Igkv4-69</i>     | Immunoglobulin kappa variable 4-69                                    | 3.795987  | 0.000832927 |
| <i>Man1a</i>        | Mannosidase 1, alpha                                                  | 2.675837  | 0.00092214  |
| <i>Aoc3</i>         | Amine oxidase, copper containing 3                                    | -2.610181 | 0.000982147 |
| <i>Ms4a4c</i>       | Membrane-spanning 4-domains, subfamily A, member 4C                   | 3.569248  | 0.000983903 |

|                   |                                                                                     |           |             |
|-------------------|-------------------------------------------------------------------------------------|-----------|-------------|
| <i>Stat4</i>      | Signal transducer and activator of transcription 4                                  | 3.533126  | 0.000984191 |
| <i>Dock11</i>     | Dedicator of cytokinesis 11                                                         | 2.789961  | 0.000984191 |
| <i>Pla2g7</i>     | Phospholipase A2, group VII (platelet-activating factor acetylhydrolase, plasma)    | -2.603766 | 0.001028025 |
| <i>Lep</i>        | Leptin                                                                              | -2.621096 | 0.0010592   |
| <i>Cytip</i>      | Cytohesin 1 interacting protein                                                     | 3.446782  | 0.001074213 |
| <i>Slamf6</i>     | SLAM family member 6                                                                | 3.275000  | 0.001092862 |
| <i>Enah</i>       | Enabled homolog (Drosophila)                                                        | 2.646976  | 0.00111811  |
| <i>Ighv7-3</i>    | Immunoglobulin heavy variable 7-3                                                   | 3.895045  | 0.001134759 |
| <i>Thrsp</i>      | Thyroid hormone responsive                                                          | -2.587099 | 0.0011567   |
| <i>Slfn9</i>      | Schlafen 9                                                                          | 3.464999  | 0.0012256   |
| <i>Lef1</i>       | Lymphoid enhancer binding factor 1                                                  | 3.183492  | 0.001229218 |
| <i>Btla</i>       | B and T lymphocyte associated                                                       | 3.413153  | 0.001258718 |
| <i>Mical2</i>     | Microtubule associated monooxygenase, calponin and LIM domain containing 2          | -2.510413 | 0.001358841 |
| <i>Siglec1</i>    | Sialic acid binding Ig-like lectin 1, sialoadhesin                                  | 2.928395  | 0.00144171  |
| <i>Eml4</i>       | Echinoderm microtubule associated protein like 4                                    | 2.781995  | 0.00167963  |
| <i>Ighv1-19</i>   | Immunoglobulin heavy variable V1-19                                                 | 3.367330  | 0.001695767 |
| <i>Actr3</i>      | ARP3 actin-related protein 3                                                        | 2.488222  | 0.001781265 |
| <i>Tcrb-J</i>     | T cell receptor beta, joining region                                                | 3.080586  | 0.001795145 |
| <i>Cd27</i>       | CD27 antigen                                                                        | 3.275897  | 0.001810382 |
| <i>Gbp4</i>       | Guanylate binding protein 4                                                         | 2.815205  | 0.001955207 |
| <i>Cd84</i>       | CD84 antigen                                                                        | 2.883708  | 0.001965417 |
| <i>BE692007</i>   | Expressed sequence BE692007                                                         | 3.687109  | 0.002064728 |
| <i>Fhl1</i>       | Four and a half LIM domains 1                                                       | 2.551490  | 0.002097917 |
| <i>Rac2</i>       | RAS-related C3 botulinum substrate 2                                                | 2.585754  | 0.002214744 |
| <i>Fcgr2a</i>     | Fc receptor, IgE, low affinity II, alpha polypeptide                                | 3.349603  | 0.002259893 |
| <i>Srgn</i>       | Serglycin                                                                           | 2.498791  | 0.002340615 |
| <i>Ccr7</i>       | Chemokine (C-C motif) receptor 7                                                    | 2.873163  | 0.002340615 |
| <i>Ptk2b</i>      | PTK2 protein tyrosine kinase 2 beta                                                 | 2.741604  | 0.002350974 |
| <i>Hpse</i>       | Heparanase                                                                          | 2.700338  | 0.002399199 |
| <i>Traj20</i>     | T cell receptor alpha joining 20                                                    | 3.597588  | 0.002402298 |
| <i>Ms4a6c</i>     | Membrane-spanning 4-domains, subfamily A, member 6C                                 | 3.251015  | 0.002402298 |
| <i>Apbb1ip</i>    | Amyloid beta (A4) precursor protein-binding, family B, member 1 interacting protein | 2.773581  | 0.002402298 |
| <i>Igkv15-103</i> | Immunoglobulin kappa chain variable 15-103                                          | 2.746025  | 0.002439022 |
| <i>Tespa1</i>     | Thymocyte expressed, positive selection associated 1                                | 3.448371  | 0.002505782 |
| <i>Plcg2</i>      | Phospholipase C, gamma 2                                                            | 2.783982  | 0.002576994 |

|                  |                                                                                       |           |             |
|------------------|---------------------------------------------------------------------------------------|-----------|-------------|
| <i>Vav1</i>      | Vav 1 oncogene                                                                        | 2.814786  | 0.002719009 |
| <i>Gm18853</i>   | GTPase, very large interferon inducible 1 pseudogene                                  | 2.520037  | 0.002847865 |
| <i>Serpinb1a</i> | Serine (or cysteine) peptidase inhibitor, clade B, member 1a                          | 2.742953  | 0.002883344 |
| <i>Angptl4</i>   | Angiopoietin-like 4                                                                   | -2.615778 | 0.002902851 |
| <i>Igsf6</i>     | Immunoglobulin superfamily, member 6                                                  | 2.910930  | 0.002999457 |
| <i>Trim59</i>    | Tripartite motif-containing 59                                                        | 3.038133  | 0.002999564 |
| <i>Mb</i>        | Myoglobin                                                                             | 2.275329  | 0.003007459 |
| <i>Lmcd1</i>     | LIM and cysteine-rich domains 1                                                       | 2.343687  | 0.003007459 |
| <i>Inpp4b</i>    | Inositol polyphosphate-4-phosphatase, type II                                         | 2.627672  | 0.003007459 |
| <i>Gm10267</i>   | Predicted gene 10267                                                                  | 3.319325  | 0.003018581 |
| <i>Ccdc88a</i>   | Coiled coil domain containing 88A                                                     | 2.548326  | 0.003365085 |
| <i>Wdfy4</i>     | WD repeat and FYVE domain containing 4                                                | 2.708596  | 0.003365085 |
| <i>Itga4</i>     | Integrin alpha 4                                                                      | 2.557386  | 0.003365085 |
| <i>Cd3e</i>      | CD3 antigen, epsilon polypeptide                                                      | 2.555924  | 0.00337812  |
| <i>Gm10718</i>   | Predicted gene 10718 [Source:MGI Symbol;Acc:MGI:3642028]                              | -2.415832 | 0.003535879 |
| <i>Prg4</i>      | Proteoglycan 4 (megakaryocyte stimulating factor, articular superficial zone protein) | 2.631609  | 0.00356826  |
| <i>Pydc4</i>     | Pyrin domain containing 4                                                             | 3.311053  | 0.003585987 |
| <i>Traj30</i>    | T cell receptor alpha joining 30                                                      | 3.432632  | 0.003659721 |
| <i>Gm8989</i>    | Very large inducible GTPase 1 pseudogene                                              | 2.457148  | 0.003666822 |
| <i>Gm24525</i>   | Predicted gene, 24525 [Source:MGI Symbol;Acc:MGI:5454302]                             | 2.497172  | 0.003733774 |
| <i>Ltf</i>       | Lactotransferrin                                                                      | -3.050276 | 0.003733774 |
| <i>Gm24588</i>   | Predicted gene, 24588 [Source:MGI Symbol;Acc:MGI:5454365]                             | 3.162356  | 0.003830879 |
| <i>Cd96</i>      | CD96 antigen                                                                          | 3.492633  | 0.003834672 |
| <i>Fasn</i>      | Fatty acid synthase                                                                   | -2.237635 | 0.004242857 |
| <i>Arhgdib</i>   | Rho, GDP dissociation inhibitor (GDI) beta                                            | 2.615941  | 0.004321403 |
| <i>Cfh</i>       | Complement component factor h                                                         | 2.397357  | 0.004412941 |
| <i>Cyth4</i>     | Cytohesin 4                                                                           | 2.452180  | 0.004929348 |
| <i>Cyfp2</i>     | Cytoplasmic FMR1 interacting protein 2                                                | 2.555021  | 0.005254131 |
| <i>Sat1</i>      | Spermidine/spermine N1-acetyl transferase 1                                           | 2.430874  | 0.005520293 |
| <i>Igh-V7183</i> | Immunoglobulin heavy chain (V7183 family)                                             | 3.430788  | 0.005555156 |
| <i>Lgals12</i>   | Lectin, galactose binding, soluble 12                                                 | -2.376099 | 0.005680479 |
| <i>Gm8979</i>    | Very large inducible GTPase 1 pseudogene                                              | 2.371328  | 0.005747562 |
| <i>Csn1s2a</i>   | Casein alpha s2-like A                                                                | -3.203280 | 0.005874172 |
| <i>Mir5099</i>   | MicroRNA 5099                                                                         | -1.657036 | 0.005876739 |



|                                 |                                                              |           |             |
|---------------------------------|--------------------------------------------------------------|-----------|-------------|
| <i>Prkag3</i>                   | Protein kinase, AMP-activated, gamma 3 non-catalytic subunit | -2.362444 | 0.005895163 |
| <i>Lcn2</i>                     | Lipocalin 2                                                  | -2.519697 | 0.005913239 |
| <i>Igkv5-43</i>                 | Immunoglobulin kappa chain variable 5-43                     | 3.207857  | 0.006163646 |
| <i>Akna</i>                     | AT-hook transcription factor                                 | 2.625396  | 0.006281686 |
| <i>Gm10715</i>                  | Predicted gene 10715 [Source:MGI Symbol;Acc:MGI:3642376]     | -2.351555 | 0.006347041 |
| <i>Cxcr5</i>                    | Chemokine (C-X-C motif) receptor 5                           | 2.742678  | 0.006354229 |
| <i>St3gal5</i>                  | ST3 beta-galactoside alpha-2,3-sialyltransferase 5           | 2.379775  | 0.006500756 |
| <i>Snora7a</i>                  | Small nucleolar RNA, H/ACA box 7A                            | 2.343346  | 0.006521848 |
| <i>Igkv4-79</i>                 | Immunoglobulin kappa variable 4-79                           | 2.546119  | 0.006547125 |
| <i>Ptpn3</i>                    | Protein tyrosine phosphatase, non-receptor type 3            | 2.352541  | 0.007310712 |
| <i>Dock8</i>                    | Dedicator of cytokinesis 8                                   | 2.459065  | 0.007723878 |
| <i>Igkv8-21</i>                 | Immunoglobulin kappa variable 8-21                           | 2.989274  | 0.008329242 |
| <i>Ifi203</i>                   | Interferon activated gene 203                                | 2.439668  | 0.00841883  |
| <i>Rapgef6</i>                  | Rap guanine nucleotide exchange factor (GEF) 6               | 2.470144  | 0.00841883  |
| <i>AI504432</i>                 | Expressed sequence AI504432                                  | 3.251240  | 0.008540969 |
| <i>Baz1a</i>                    | Bromodomain adjacent to zinc finger domain 1A                | 2.446255  | 0.008631044 |
| <i>Rock1</i>                    | Rho-associated coiled-coil containing protein kinase 1       | 2.312855  | 0.0088963   |
| <i>Fam111a</i>                  | Family with sequence similarity 111, member A                | 2.724582  | 0.0088963   |
| <i>Lyve1</i>                    | Lymphatic vessel endothelial hyaluronan receptor 1           | 2.356050  | 0.009002276 |
| <i>Igkv17-127</i>               | Immunoglobulin kappa variable 17-127                         | 3.261849  | 0.009027763 |
| <i>Arhgap30</i>                 | Rho GTPase activating protein 30                             | 2.467782  | 0.009376338 |
| <i>Traj22</i>                   | T cell receptor alpha joining 22                             | 2.996711  | 0.010071581 |
| <i>Igkv6-20</i>                 | Immunoglobulin kappa variable 6-20                           | 2.798250  | 0.010071581 |
| <i>Cxcr4</i>                    | Chemokine (C-X-C motif) receptor 4                           | 2.420030  | 0.010165808 |
| <i>Arhgap25</i>                 | Rho GTPase activating protein 25                             | 2.625551  | 0.010440601 |
| <i>6330407A03</i><br><i>Rik</i> | RIKEN cDNA 6330407A03 gene                                   | 2.778295  | 0.010508163 |
| <i>Lrrn1</i>                    | Leucine rich repeat protein 1, neuronal                      | 2.547011  | 0.010509001 |
| <i>Gm26440</i>                  | Predicted gene, 26440 [Source:MGI Symbol;Acc:MGI:5456217]    | 2.271515  | 0.010746776 |
| <i>Dpp4</i>                     | Dipeptidylpeptidase 4                                        | 2.436162  | 0.010785965 |
| <i>F8</i>                       | Coagulation factor VIII                                      | 2.822336  | 0.01094913  |
| <i>Cacng1</i>                   | Calcium channel, voltage-dependent, gamma subunit 1          | -2.242635 | 0.011240559 |
| <i>Traj2</i>                    | T cell receptor alpha joining 2                              | 3.174908  | 0.011240559 |
| <i>Sncg</i>                     | Synuclein, gamma                                             | -2.273886 | 0.011378523 |
| <i>Myh1</i>                     | Myosin, heavy polypeptide 1, skeletal muscle, adult          | 1.777057  | 0.011441903 |

|                     |                                                               |           |             |
|---------------------|---------------------------------------------------------------|-----------|-------------|
| <i>Fcrl1</i>        | Fc receptor-like 1                                            | 2.774110  | 0.011441903 |
| <i>Gm17757</i>      | GTPase, very large interferon inducible 1 pseudogene          | 2.315671  | 0.011441903 |
| <i>Orml</i>         | Orosomucoid 1                                                 | -2.376931 | 0.011692644 |
| <i>Bcl11a</i>       | B cell CLL/lymphoma 11A (zinc finger protein)                 | 2.791131  | 0.011820853 |
| <i>Stat1</i>        | Signal transducer and activator of transcription 1            | 2.260442  | 0.012104993 |
| <i>Ptbp3</i>        | Polypyrimidine tract binding protein 3                        | 2.278801  | 0.012104993 |
| <i>Id2</i>          | Inhibitor of DNA binding 2                                    | 2.426909  | 0.012555446 |
| <i>Gm22973</i>      | Predicted gene, 22973 [Source:MGI Symbol;Acc:MGI:5452750]     | 2.609394  | 0.012571734 |
| <i>Snora74a</i>     | Small nucleolar RNA, H/ACA box 74A                            | 2.234853  | 0.012919013 |
| <i>Hmha1</i>        | Histocompatibility (minor) HA-1                               | 2.421129  | 0.013346186 |
| <i>Tcf7</i>         | Transcription factor 7, T cell specific                       | 2.380336  | 0.01384378  |
| <i>Traj43</i>       | T cell receptor alpha joining 43                              | 2.460199  | 0.014085245 |
| <i>Tnc</i>          | Tenascin C                                                    | 2.536132  | 0.014119702 |
| <i>Traj36</i>       | T cell receptor alpha joining 36                              | 3.175844  | 0.014229073 |
| <i>Ifi44</i>        | Interferon-induced protein 44                                 | 2.298990  | 0.014419417 |
| <i>Gm4759</i>       | GTPase, very large interferon inducible 1 pseudogene          | 3.160680  | 0.014857094 |
| <i>LOC101055663</i> | Component of Sp100-rs-like                                    | 3.163705  | 0.014909621 |
| <i>Gys2</i>         | Glycogen synthase 2                                           | -2.527472 | 0.015019358 |
| <i>Dnase1l3</i>     | Deoxyribonuclease 1-like 3                                    | 2.804201  | 0.015116738 |
| <i>Sim2</i>         | Single-minded homolog 2 (Drosophila)                          | -2.225454 | 0.015235525 |
| <i>Gpr65</i>        | G-protein coupled receptor 65                                 | 2.788038  | 0.015883464 |
| <i>Igkv12-44</i>    | Immunoglobulin kappa variable 12-44                           | 2.704946  | 0.016083404 |
| <i>Aff3</i>         | AF4/FMR2 family, member 3                                     | 2.413924  | 0.01616958  |
| <i>Ly6c2</i>        | Lymphocyte antigen 6 complex, locus C2                        | 2.323758  | 0.016384861 |
| <i>Ifi30</i>        | Interferon gamma inducible protein 30                         | 2.229639  | 0.017229862 |
| <i>B3gnt5</i>       | UDP-GlcNAc:betaGal beta-1,3-N-acetylglucosaminyltransferase 5 | 2.829555  | 0.017694507 |
| <i>Gm22155</i>      | Predicted gene, 22155 [Source:MGI Symbol;Acc:MGI:5451932]     | 2.212604  | 0.017815488 |
| <i>Plek</i>         | Pleckstrin                                                    | 2.460634  | 0.01804354  |
| <i>Spink11</i>      | Serine peptidase inhibitor, Kazal type 11                     | 3.049093  | 0.018146645 |
| <i>Fabp3-ps1</i>    | Fatty acid binding protein 3, muscle and heart, pseudogene 1  | 2.182830  | 0.018266666 |
| <i>Inpp5d</i>       | Inositol polyphosphate-5-phosphatase D                        | 2.507283  | 0.018856792 |
| <i>Trbv31</i>       | T cell receptor beta, variable 31                             | 2.645976  | 0.019839065 |
| <i>F2r</i>          | Coagulation factor II (thrombin) receptor                     | 2.256513  | 0.020547361 |
| <i>Gm22676</i>      | Predicted gene, 22676 [Source:MGI                             | 2.378653  | 0.020870804 |

|                         | Symbol;Acc:MGI:5452453]                                      |           |             |
|-------------------------|--------------------------------------------------------------|-----------|-------------|
| <i>Cd8b1</i>            | CD8 antigen, beta chain 1                                    | 2.698308  | 0.021186091 |
| <i>Gm20506</i>          | Predicted gene 20506                                         | 3.068886  | 0.021451884 |
| <i>Smc4</i>             | Structural maintenance of chromosomes 4                      | 2.221293  | 0.021547268 |
| <i>Rap1b</i>            | RAS related protein 1b                                       | 2.158666  | 0.021951174 |
| <i>Ogn</i>              | Osteoglycin                                                  | 2.159092  | 0.021986785 |
| <i>St6gal1</i>          | Beta galactoside alpha 2,6 sialyltransferase 1               | 2.493384  | 0.022032063 |
| <i>Pik3ap1</i>          | Phosphoinositide-3-kinase adaptor protein 1                  | 2.293355  | 0.02256013  |
| <i>Elf1</i>             | E74-like factor 1                                            | 2.206845  | 0.023460381 |
| <i>LOC1026336</i><br>27 | Tropomyosin alpha-4 chain pseudogene                         | 2.185222  | 0.023653378 |
| <i>Kif21b</i>           | Kinesin family member 21B                                    | 2.402689  | 0.024154052 |
| <i>Mir703</i>           | MicroRNA 703                                                 | 2.170541  | 0.024154052 |
| <i>Pdk4</i>             | Pyruvate dehydrogenase kinase, isoenzyme 4                   | 1.917657  | 0.024332586 |
| <i>Plin1</i>            | Perilipin 1                                                  | -2.159175 | 0.024544784 |
| <i>Cnn2</i>             | Calponin 2                                                   | 2.208329  | 0.024903186 |
| <i>Ighv1-43</i>         | Immunoglobulin heavy variable V1-43                          | 2.960016  | 0.025124966 |
| <i>Lepr</i>             | Leptin receptor                                              | 2.795265  | 0.026147544 |
| <i>Syk</i>              | Spleen tyrosine kinase                                       | 2.351310  | 0.026443134 |
| <i>Scarna8</i>          | Small Cajal body-specific RNA 8                              | 2.319912  | 0.026611121 |
| <i>Cd69</i>             | CD69 antigen                                                 | 2.838945  | 0.026809801 |
| <i>Klhl34</i>           | Kelch-like 34                                                | 2.244789  | 0.027172552 |
| <i>Krt18</i>            | Keratin 18                                                   | -2.600385 | 0.027432055 |
| <i>St8sia4</i>          | ST8 alpha-N-acetyl-neuraminide alpha-2,8-sialyltransferase 4 | 2.221501  | 0.027505724 |
| <i>Ptma</i>             | Prothymosin alpha                                            | 2.126455  | 0.027538095 |
| <i>Fyb</i>              | FYN binding protein                                          | 2.831281  | 0.027815978 |
| <i>Cxcl12</i>           | Chemokine (C-X-C motif) ligand 12                            | 2.134569  | 0.02892272  |
| <i>Smox</i>             | Spermine oxidase                                             | -2.137130 | 0.029459765 |
| <i>Marco</i>            | Macrophage receptor with collagenous structure               | 2.269029  | 0.02989193  |
| <i>Rassf2</i>           | Ras association (RalGDS/AF-6) domain family member 2         | 2.266938  | 0.030419582 |
| <i>Aim2</i>             | Absent in melanoma 2                                         | 2.843504  | 0.030732924 |
| <i>Tecr</i>             | Trans-2,3-enoyl-CoA reductase                                | -1.998289 | 0.030878007 |
| <i>Rasa13</i>           | RAS protein activator like 3                                 | 2.363967  | 0.031055549 |
| <i>Ccl8</i>             | Chemokine (C-C motif) ligand 8                               | 2.296489  | 0.031137278 |
| <i>Grap2</i>            | GRB2-related adaptor protein 2                               | 2.455046  | 0.031159485 |
| <i>Pdlim1</i>           | PDZ and LIM domain 1 (elfin)                                 | 2.137582  | 0.031159485 |
| <i>Zdhhc20</i>          | Zinc finger, DHHC domain containing 20                       | 2.250889  | 0.031858775 |
| <i>Six2</i>             | Sine oculis-related homeobox 2                               | -2.416577 | 0.031858775 |

|                  |                                                           |           |             |
|------------------|-----------------------------------------------------------|-----------|-------------|
| <i>Bach2</i>     | BTB and CNC homology 2                                    | 2.437268  | 0.031858775 |
| <i>Ddx60</i>     | DEAD (Asp-Glu-Ala-Asp) box polypeptide 60                 | 2.815312  | 0.031858775 |
| <i>Tmem123</i>   | Transmembrane protein 123                                 | 2.102186  | 0.032142539 |
| <i>Rasd2</i>     | RASD family, member 2                                     | -2.129021 | 0.032512135 |
| <i>Gm8369</i>    | Predicted gene 8369                                       | 2.828927  | 0.032515215 |
| <i>Gm26384</i>   | Predicted gene, 26384 [Source:MGI Symbol;Acc:MGI:5456161] | 2.058302  | 0.032659623 |
| <i>Agpat2</i>    | 1-acylglycerol-3-phosphate O-acyltransferase 2            | -2.113157 | 0.033084523 |
| <i>Pcd10</i>     | Programmed cell death 10                                  | 2.248511  | 0.033084523 |
| <i>Fchsd2</i>    | FCH and double SH3 domains 2                              | 2.200689  | 0.03419107  |
| <i>Ces1d</i>     | Carboxylesterase 1D                                       | -2.199751 | 0.034210236 |
| <i>Vcam1</i>     | Vascular cell adhesion molecule 1                         | 2.205598  | 0.034362706 |
| <i>Aqp4</i>      | Aquaporin 4                                               | 2.115348  | 0.037167255 |
| <i>Slamf7</i>    | SLAM family member 7                                      | 2.618354  | 0.03718661  |
| <i>Oub2</i>      | OTU domain, ubiquitin aldehyde binding 2                  | -2.179882 | 0.03718661  |
| <i>Traj44</i>    | T cell receptor alpha joining 44                          | 2.316738  | 0.03718661  |
| <i>Ifi2712a</i>  | Interferon, alpha-inducible protein 27 like 2A            | -2.092931 | 0.037446662 |
| <i>Tshr</i>      | Thyroid stimulating hormone receptor                      | -2.207281 | 0.038586986 |
| <i>Mki67</i>     | Antigen identified by monoclonal antibody Ki 67           | 2.328103  | 0.038586986 |
| <i>Ciita</i>     | Class II transactivator                                   | 2.261665  | 0.03868402  |
| <i>Gm10719</i>   | Predicted gene 10719 [Source:MGI Symbol;Acc:MGI:3641690]  | -2.038729 | 0.039130352 |
| <i>Gm23947</i>   | Predicted gene, 23947 [Source:MGI Symbol;Acc:MGI:5453724] | 2.354442  | 0.039276033 |
| <i>Rspo3</i>     | R-spondin 3                                               | 2.468535  | 0.039368285 |
| <i>Laptm5</i>    | Lysosomal-associated protein transmembrane 5              | 2.396087  | 0.041412858 |
| <i>Snora73b</i>  | Small nucleolar RNA, H/ACA box 73b                        | 2.060844  | 0.042473778 |
| <i>Gimap3</i>    | GTPase, IMAP family member 3                              | 2.287592  | 0.042473778 |
| <i>Mir675</i>    | MicroRNA 675                                              | 2.058131  | 0.042473778 |
| <i>Arhgap11a</i> | Rho GTPase activating protein 11A                         | 2.462272  | 0.042714463 |
| <i>Gpr174</i>    | G protein-coupled receptor 174                            | 2.723874  | 0.044231361 |
| <i>Itk</i>       | IL2 inducible T cell kinase                               | 2.515421  | 0.044394491 |
| <i>Tceb2</i>     | Transcription elongation factor B (SIII), polypeptide 2   | -1.906908 | 0.044394491 |
| <i>Gpr18</i>     | G protein-coupled receptor 18                             | 2.344280  | 0.044472279 |
| <i>Gm26175</i>   | Predicted gene, 26175 [Source:MGI Symbol;Acc:MGI:5455952] | 2.047417  | 0.044964432 |
| <i>Crlf3</i>     | Cytokine receptor-like factor 3                           | 2.182089  | 0.04540695  |
| <i>Spib</i>      | Spi-B transcription factor (Spi-1/PU.1 related)           | 2.672787  | 0.045496053 |

|                 |                                                             |           |             |
|-----------------|-------------------------------------------------------------|-----------|-------------|
| <i>Apls2</i>    | Adaptor-related protein complex 1, sigma 2 subunit          | 2.084751  | 0.045534376 |
| <i>Bdh1</i>     | 3-hydroxybutyrate dehydrogenase, type 1                     | 2.310980  | 0.045804464 |
| <i>Gm10801</i>  | Predicted gene 10801 [Source:MGI<br>Symbol;Acc:MGI:3641656] | -2.825870 | 0.045880636 |
| <i>Igkv4-78</i> | Immunoglobulin kappa variable 4-78                          | 2.435157  | 0.045970345 |
| <i>Spinkl</i>   | Serine protease inhibitor, Kazal type-like                  | 2.423152  | 0.046480226 |
| <i>Cetn3</i>    | Centrin 3                                                   | 2.228163  | 0.046763599 |
| <i>Phf11b</i>   | PHD finger protein 11B                                      | 2.192398  | 0.046763599 |
| <i>P3h2</i>     | Prolyl 3-hydroxylase 2                                      | 2.194877  | 0.047016456 |
| <i>Acly</i>     | ATP citrate lyase                                           | -2.058096 | 0.047110874 |
| <i>Tmem71</i>   | Transmembrane protein 71                                    | 2.234226  | 0.049568619 |
