# Supplementary material for: Profiling of remote skeletal muscle gene changes resulting from stimulation of atopic dermatitis disease in NC/Nga mouse model
Source: PubMed Central journal article supplement — Korean J Physiol Pharmacol. 2019 Aug 26;23(5):367–79. doi: 10.4196/kjpp.2019.23.5.367 (PMC6717787; doi:10.4196/kjpp.2019.23.5.367), 2019-08-26
Supplement: kjpp-23-367-s002.pdf [file kjpp-23-367-s002.pdf]

**Supplementary Table 2. The top 10 genes in pathways associated with atopic dermatitis (AD) identified by Kyoto Encyclopedia of Genes and Genomes (KEGG) analysis**

| KEGG pathway name                      | Gene name                                                                        | Gene symbol   | Gene ID | Fold-change | p-value     |
|----------------------------------------|----------------------------------------------------------------------------------|---------------|---------|-------------|-------------|
| Cytokine-cytokine receptor interaction |                                                                                  |               |         |             | 2.70005E-36 |
|                                        | Chemokine (C-X-C motif) ligand 13                                                | <i>Cxcl13</i> | 55985   | 9.5213      | 0           |
|                                        | Interleukin 2 receptor, gamma chain                                              | <i>Il2rg</i>  | 16186   | 6.8833      | 1.91259E-13 |
|                                        | CD4 antigen                                                                      | <i>Cd4</i>    | 12504   | 7.5465      | 2.13117E-12 |
|                                        | Interleukin 7 receptor                                                           | <i>Il7r</i>   | 16197   | 7.9501      | 3.06014E-12 |
|                                        | Chemokine (C-C motif) ligand 5                                                   | <i>Ccl5</i>   | 20304   | 3.7844      | 4.82844E-07 |
|                                        | Lymphotoxin B                                                                    | <i>Ltb</i>    | 16994   | 3.3526      | 3.66469E-05 |
|                                        | Chemokine (C-C motif) ligand 22                                                  | <i>Ccl22</i>  | 20299   | 3.3510      | 0.000217941 |
|                                        | Leptin                                                                           | <i>Lep</i>    | 16846   | -2.6211     | 0.0010592   |
|                                        | CD27 antigen                                                                     | <i>Cd27</i>   | 21940   | 3.2759      | 0.001810382 |
|                                        | Chemokine (C-C motif) receptor 7                                                 | <i>Ccr7</i>   | 12775   | 2.8732      | 0.002340615 |
| Metabolic                              |                                                                                  |               |         |             | 7.50528E-28 |
|                                        | UDP-glucose ceramide glucosyltransferase                                         | <i>Ugcg</i>   | 22234   | 3.4298      | 2.20686E-05 |
|                                        | Phosphoenolpyruvate carboxykinase 1, cytosolic                                   | <i>Pck1</i>   | 18534   | -2.8493     | 0.000149194 |
|                                        | ADP-ribosyltransferase 2b                                                        | <i>Art2b</i>  | 11872   | 4.1334      | 0.000436275 |
|                                        | Mannosidase 1, alpha                                                             | <i>Man1a</i>  | 17155   | 2.6758      | 0.00092214  |
|                                        | Amine oxidase, copper containing 3                                               | <i>Aoc3</i>   | 11754   | -2.6102     | 0.000982147 |
|                                        | Phospholipase A2, group VII (platelet-activating factor acetylhydrolase, plasma) | <i>Pla2g7</i> | 27226   | -2.6038     | 0.001028025 |
|                                        | Heparanase                                                                       | <i>Hpse</i>   | 15442   | 2.7003      | 0.002399199 |
|                                        | Phospholipase C, gamma 2                                                         | <i>Plcg2</i>  | 234779  | 2.7840      | 0.002576994 |
|                                        | Inositol polyphosphate-4-phosphatase, type II                                    | <i>Inpp4b</i> | 234515  | 2.6277      | 0.003007459 |
|                                        | Fatty acid synthase                                                              | <i>Fasn</i>   | 14104   | -2.2376     | 0.004242857 |
| NF-kappa B signaling                   |                                                                                  |               |         |             | 4.82182E-24 |
|                                        | Protein kinase C, beta                                                           | <i>Prkcb</i>  | 18751   | 4.7940      | 8.43315E-08 |
|                                        | Lymphotoxin B                                                                    | <i>Ltb</i>    | 16994   | 3.3526      | 3.66469E-05 |
|                                        | Phospholipase C, gamma 2                                                         | <i>Plcg2</i>  | 234779  | 2.7840      | 0.002576994 |
|                                        | Spleen tyrosine kinase                                                           | <i>Syk</i>    | 20963   | 2.3513      | 0.026443134 |
|                                        | Chemokine (C-X-C motif) ligand 12                                                | <i>Cxcl12</i> | 20315   | 2.1346      | 0.02892272  |
|                                        | Vascular cell adhesion molecule 1                                                | <i>Vcam1</i>  | 22329   | 2.2056      | 0.034362706 |
|                                        | B cell linker                                                                    | <i>Blnk</i>   | 17060   | 2.2740      | 0.07015631  |
|                                        | MALT1 paracaspase                                                                | <i>Malt1</i>  | 240354  | 1.9904      | 0.098788511 |
|                                        | Baculoviral IAP repeat-containing 3                                              | <i>Birc3</i>  | 11796   | 1.9096      | 0.14727599  |
|                                        | DEAD (Asp-Glu-Ala-Asp) box polypeptide 58                                        | <i>Ddx58</i>  | 230073  | 1.9400      | 0.158848743 |

|                                      |                                                            |                 |           |         |             |
|--------------------------------------|------------------------------------------------------------|-----------------|-----------|---------|-------------|
| Chemokine signaling                  |                                                            |                 |           |         | 1.81802E-23 |
|                                      | Chemokine (C-X-C motif) ligand 13                          | <i>Cxcl13</i>   | 55985     | 9.5213  | 0           |
|                                      | Protein kinase C, beta                                     | <i>Prkcb</i>    | 18751     | 4.7940  | 8.43315E-08 |
|                                      | Chemokine (C-C motif) ligand 5                             | <i>Ccl5</i>     | 20304     | 3.7844  | 4.82844E-07 |
|                                      | Dedicator of cyto-kinesis 2                                | <i>Dock2</i>    | 94176     | 3.6986  | 4.06357E-06 |
|                                      | Chemokine (C-C motif) ligand 22                            | <i>Ccl22</i>    | 20299     | 3.3510  | 0.000217941 |
|                                      | RAS-related C3 botulinum substrate 2                       | <i>Rac2</i>     | 19354     | 2.5858  | 0.002214744 |
|                                      | Chemokine (C-C motif) receptor 7                           | <i>Ccr7</i>     | 12775     | 2.8732  | 0.002340615 |
|                                      | PTK2 protein tyrosine kinase 2 beta                        | <i>Ptk2b</i>    | 19229     | 2.7416  | 0.002350974 |
|                                      | Vav 1 oncogene                                             | <i>Vav1</i>     | 22324     | 2.8148  | 0.002719009 |
|                                      | Chemokine (C-X-C motif) receptor 5                         | <i>Cxcr5</i>    | 12145     | 2.7427  | 0.006354229 |
| Leukocyte transendothelial migration |                                                            |                 |           |         | 6.03478E-23 |
|                                      | Protein kinase C, beta                                     | <i>Prkcb</i>    | 18751     | 4.7940  | 8.43315E-08 |
|                                      | Cytochrome b-245, beta polypeptide                         | <i>Cybb</i>     | 13058     | 3.8606  | 8.36122E-07 |
|                                      | Integrin beta 2                                            | <i>Itgb2</i>    | 16414     | 3.2753  | 3.75636E-05 |
|                                      | Integrin alpha L                                           | <i>Itgal</i>    | 16408     | 3.0770  | 0.000441262 |
|                                      | RAS-related C3 botulinum substrate 2                       | <i>Rac2</i>     | 19354     | 2.5858  | 0.002214744 |
|                                      | PTK2 protein tyrosine kinase 2 beta                        | <i>Ptk2b</i>    | 19229     | 2.7416  | 0.002350974 |
|                                      | Phospholipase C, gamma 2                                   | <i>Plcg2</i>    | 234779    | 2.7840  | 0.002576994 |
|                                      | Vav 1 oncogene                                             | <i>Vav1</i>     | 22324     | 2.8148  | 0.002719009 |
|                                      | Integrin alpha 4                                           | <i>Itga4</i>    | 16401     | 2.5574  | 0.003365085 |
|                                      | Rho-associated coiled-coil containing protein kinase 1     | <i>Rock1</i>    | 19877     | 2.3129  | 0.0088963   |
| Hematopoietic cell lineage           |                                                            |                 |           |         | 8.0555E-23  |
|                                      | Complement receptor 2                                      | <i>Cr2</i>      | 12902     | 9.2697  | 0           |
|                                      | Membrane-spanning 4-domains, subfamily A, member 1         | <i>Ms4a1</i>    | 12482     | 8.6954  | 0           |
|                                      | CD3 antigen, gamma polypeptide                             | <i>Cd3g</i>     | 12502     | 12.8406 | 0           |
|                                      | CD4 antigen                                                | <i>Cd4</i>      | 12504     | 7.5465  | 2.13117E-12 |
|                                      | Interleukin 7 receptor                                     | <i>Il7r</i>     | 16197     | 7.9501  | 3.06014E-12 |
|                                      | Histocompatibility 2, class II antigen E alpha, pseudogene | <i>H2-Ea-ps</i> | 100504404 | 4.9824  | 2.5564E-11  |
|                                      | CD22 antigen                                               | <i>Cd22</i>     | 12483     | 4.3565  | 3.20735E-06 |
|                                      | Histocompatibility 2, class II, locus Mb2                  | <i>H2-DMb2</i>  | 15000     | 3.1559  | 0.000690586 |
|                                      | Fc receptor, igc, low affinity II, alpha polypeptide       | <i>Fcer2a</i>   | 14128     | 3.3496  | 0.002259893 |
|                                      | Integrin alpha 4                                           | <i>Itga4</i>    | 16401     | 2.5574  | 0.003365085 |
| B cell receptor signaling            |                                                            |                 |           |         | 4.0307E-22  |
|                                      | Complement receptor 2                                      | <i>Cr2</i>      | 12902     | 9.2697  | 0           |
|                                      | Protein kinase C, beta                                     | <i>Prkcb</i>    | 18751     | 4.7940  | 8.43315E-08 |
|                                      | CD22 antigen                                               | <i>Cd22</i>     | 12483     | 4.3565  | 3.20735E-06 |

|                           |                                                            |                 |           |         |             |
|---------------------------|------------------------------------------------------------|-----------------|-----------|---------|-------------|
|                           | CD79A antigen (immunoglobulin-associated alpha)            | <i>Cd79a</i>    | 12518     | 3.8307  | 6.00136E-06 |
|                           | Protein tyrosine phosphatase, non-receptor type 6          | <i>Ptpn6</i>    | 15170     | 3.2050  | 5.88237E-05 |
|                           | CD79B antigen                                              | <i>Cd79b</i>    | 15985     | 3.3977  | 0.000261267 |
|                           | RAS-related C3 botulinum substrate 2                       | <i>Rac2</i>     | 19354     | 2.5858  | 0.002214744 |
|                           | Phospholipase C, gamma 2                                   | <i>Plcg2</i>    | 234779    | 2.7840  | 0.002576994 |
|                           | Vav 1 oncogene                                             | <i>Vav1</i>     | 22324     | 2.8148  | 0.002719009 |
|                           | Inositol polyphosphate-5-phosphatase D                     | <i>Inpp5d</i>   | 16331     | 2.5073  | 0.018856792 |
| <hr/>                     |                                                            |                 |           |         |             |
| Cell adhesion molecules   |                                                            |                 |           |         | 1.4218E-20  |
|                           | Protein tyrosine phosphatase, receptor type, C             | <i>Ptprc</i>    | 19264     | 14.9040 | 0           |
|                           | Glycosylation dependent cell adhesion molecule 1           | <i>Glycam1</i>  | 14663     | 35.4278 | 0           |
|                           | Selectin, lymphocyte                                       | <i>Sell</i>     | 20343     | 8.1342  | 1.91259E-13 |
|                           | CD4 antigen                                                | <i>Cd4</i>      | 12504     | 7.5465  | 2.13117E-12 |
|                           | Histocompatibility 2, class II antigen E alpha, pseudogene | <i>H2-Ea-ps</i> | 100504404 | 4.9824  | 2.5564E-11  |
|                           | Selectin, platelet (p-selectin) ligand                     | <i>Selplg</i>   | 20345     | 4.8606  | 4.06416E-08 |
|                           | CD22 antigen                                               | <i>Cd22</i>     | 12483     | 4.3565  | 3.20735E-06 |
|                           | Histocompatibility 2, M region locus 2                     | <i>H2-M2</i>    | 14990     | 4.3295  | 1.07827E-05 |
|                           | Integrin beta 2                                            | <i>Itgb2</i>    | 16414     | 3.2753  | 3.75636E-05 |
|                           | Integrin alpha L                                           | <i>Itgal</i>    | 16408     | 3.0770  | 0.000441262 |
| <hr/>                     |                                                            |                 |           |         |             |
| T cell receptor signaling |                                                            |                 |           |         | 4.43925E-20 |
|                           | Protein tyrosine phosphatase, receptor type, C             | <i>Ptprc</i>    | 19264     | 14.9040 | 0           |
|                           | CD3 antigen, gamma polypeptide                             | <i>Cd3g</i>     | 12502     | 12.8406 | 0           |
|                           | CD4 antigen                                                | <i>Cd4</i>      | 12504     | 7.5465  | 2.13117E-12 |
|                           | Protein tyrosine phosphatase, non-receptor type 6          | <i>Ptpn6</i>    | 15170     | 3.2050  | 5.88237E-05 |
|                           | Lymphocyte cytosolic protein 2                             | <i>Lcp2</i>     | 16822     | 3.0751  | 0.000100617 |
|                           | Vav 1 oncogene                                             | <i>Vav1</i>     | 22324     | 2.8148  | 0.002719009 |
|                           | CD3 antigen, epsilon polypeptide                           | <i>Cd3e</i>     | 12501     | 2.5559  | 0.00337812  |
|                           | CD8 antigen, beta chain 1                                  | <i>Cd8b1</i>    | 12526     | 2.6983  | 0.021186091 |
|                           | GRB2-related adaptor protein 2                             | <i>Grap2</i>    | 17444     | 2.4550  | 0.031159485 |
|                           | IL2 inducible T cell kinase                                | <i>Itk</i>      | 16428     | 2.5154  | 0.044394491 |
| <hr/>                     |                                                            |                 |           |         |             |
| Phagosome                 |                                                            |                 |           |         | 8.9857E-20  |
|                           | Cathepsin S                                                | <i>Ctss</i>     | 13040     | 6.2632  | 3.60017E-13 |
|                           | Histocompatibility 2, class II antigen E alpha, pseudogene | <i>H2-Ea-ps</i> | 100504404 | 4.9824  | 2.5564E-11  |
|                           | CD209b antigen                                             | <i>Cd209b</i>   | 69165     | 5.0347  | 7.14709E-10 |
|                           | Cytochrome b-245, beta polypeptide                         | <i>Cybb</i>     | 13058     | 3.8606  | 8.36122E-07 |
|                           | Histocompatibility 2, M region locus 2                     | <i>H2-M2</i>    | 14990     | 4.3295  | 1.07827E-05 |
|                           | Integrin beta 2                                            | <i>Itgb2</i>    | 16414     | 3.2753  | 3.75636E-05 |
|                           | Histocompatibility 2, class II, locus Mb2                  | <i>H2-DMb2</i>  | 15000     | 3.1559  | 0.000690586 |

|                                     |                                                            |                 |           |         |             |
|-------------------------------------|------------------------------------------------------------|-----------------|-----------|---------|-------------|
|                                     | Macrophage receptor with collagenous structure             | <i>Marco</i>    | 17167     | 2.2690  | 0.02989193  |
|                                     | Neutrophil cytosolic factor 1                              | <i>Ncf1</i>     | 17969     | 2.1895  | 0.050281506 |
|                                     | Complement component 3                                     | <i>C3</i>       | 12266     | 2.0112  | 0.051314556 |
| Regulation of actin cytoskeleton    |                                                            |                 |           |         | 1.42596E-18 |
|                                     | Integrin beta 2                                            | <i>Itgb2</i>    | 16414     | 3.2753  | 3.75636E-05 |
|                                     | Phosphatidylinositol-5-phosphate 4-kinase, type II, alpha  | <i>Pip4k2a</i>  | 18718     | 3.2470  | 4.87833E-05 |
|                                     | NCK associated protein 1 like                              | <i>Nckap1l</i>  | 105855    | 3.3190  | 5.04094E-05 |
|                                     | Integrin alpha L                                           | <i>Itgal</i>    | 16408     | 3.0770  | 0.000441262 |
|                                     | Enabled homolog (Drosophila)                               | <i>Enah</i>     | 13800     | 2.6470  | 0.00111811  |
|                                     | RAS-related C3 botulinum substrate 2                       | <i>Rac2</i>     | 19354     | 2.5858  | 0.002214744 |
|                                     | Vav 1 oncogene                                             | <i>Vav1</i>     | 22324     | 2.8148  | 0.002719009 |
|                                     | Integrin alpha 4                                           | <i>Itga4</i>    | 16401     | 2.5574  | 0.003365085 |
|                                     | Cytoplasmic FMR1 interacting protein 2                     | <i>Cyfp2</i>    | 76884     | 2.5550  | 0.005254131 |
|                                     | Rho-associated coiled-coil containing protein kinase 1     | <i>Rock1</i>    | 19877     | 2.3129  | 0.0088963   |
| Th17 cell differentiation           |                                                            |                 |           |         | 6.31027E-18 |
|                                     | CD3 antigen, gamma polypeptide                             | <i>Cd3g</i>     | 12502     | 12.8406 | 0           |
|                                     | Interleukin 2 receptor, gamma chain                        | <i>Il2rg</i>    | 16186     | 6.8833  | 1.91259E-13 |
|                                     | CD4 antigen                                                | <i>Cd4</i>      | 12504     | 7.5465  | 2.13117E-12 |
|                                     | Histocompatibility 2, class II antigen E alpha, pseudogene | <i>H2-Ea-ps</i> | 100504404 | 4.9824  | 2.5564E-11  |
|                                     | Histocompatibility 2, class II, locus Mb2                  | <i>H2-DMb2</i>  | 15000     | 3.1559  | 0.000690586 |
|                                     | CD3 antigen, epsilon polypeptide                           | <i>Cd3e</i>     | 12501     | 2.5559  | 0.00337812  |
|                                     | Signal transducer and activator of transcription 1         | <i>Stat1</i>    | 20846     | 2.2604  | 0.012104993 |
|                                     | Interleukin 6 receptor, alpha                              | <i>Il6ra</i>    | 16194     | 1.9453  | 0.127652915 |
|                                     | Transforming growth factor, beta 1                         | <i>Tgfb1</i>    | 21803     | 1.8611  | 0.200327384 |
|                                     | Linker for activation of T cells                           | <i>Lat</i>      | 16797     | 1.9337  | 0.216306508 |
| PI3K-Akt signaling pathway          |                                                            |                 |           |         | 6.96949E-17 |
|                                     | Interleukin 2 receptor, gamma chain                        | <i>Il2rg</i>    | 16186     | 6.8833  | 1.91259E-13 |
|                                     | Interleukin 7 receptor                                     | <i>Il7r</i>     | 16197     | 7.9501  | 3.06014E-12 |
|                                     | Phosphoenolpyruvate carboxykinase 1, cytosolic             | <i>Pck1</i>     | 18534     | -2.8493 | 0.000149194 |
|                                     | Integrin alpha 4                                           | <i>Itga4</i>    | 16401     | 2.5574  | 0.003365085 |
|                                     | Tenascin C                                                 | <i>Tnc</i>      | 21923     | 2.5361  | 0.014119702 |
|                                     | Glycogen synthase 2                                        | <i>Gys2</i>     | 232493    | -2.5275 | 0.015019358 |
|                                     | Coagulation factor II (thrombin) receptor                  | <i>F2r</i>      | 14062     | 2.2565  | 0.020547361 |
|                                     | Phosphoinositide-3-kinase adaptor protein 1                | <i>Pik3ap1</i>  | 83490     | 2.2934  | 0.02256013  |
|                                     | Spleen tyrosine kinase                                     | <i>Syk</i>      | 20963     | 2.3513  | 0.026443134 |
|                                     | Prolactin receptor                                         | <i>Prlr</i>     | 19116     | -2.4817 | 0.075280525 |
| NOD-like receptor signaling pathway |                                                            |                 |           |         | 4.27592E-16 |

|                            |                                                                |                |        |         |             |
|----------------------------|----------------------------------------------------------------|----------------|--------|---------|-------------|
|                            | Chemokine (C-C motif) ligand 5                                 | <i>Ccl5</i>    | 20304  | 3.7844  | 4.82844E-07 |
|                            | Cytochrome b-245, beta polypeptide                             | <i>Cybb</i>    | 13058  | 3.8606  | 8.36122E-07 |
|                            | Signal transducer and activator of transcription 1             | <i>Stat1</i>   | 20846  | 2.2604  | 0.012104993 |
|                            | Absent in melanoma 2                                           | <i>Aim2</i>    | 383619 | 2.8435  | 0.030732924 |
|                            | Transmembrane protein 173                                      | <i>Tmem173</i> | 72512  | 2.1258  | 0.112315813 |
|                            | Baculoviral IAP repeat-containing 3                            | <i>Birc3</i>   | 11796  | 1.9096  | 0.14727599  |
|                            | B cell leukemia/lymphoma 2                                     | <i>Bcl2</i>    | 12043  | 1.8058  | 0.277335879 |
|                            | NLR family, apoptosis inhibitory protein 6                     | <i>Naip6</i>   | 17952  | 2.1419  | 0.374297539 |
|                            | Baculoviral IAP repeat-containing 2                            | <i>Birc2</i>   | 11797  | 1.6539  | 0.47899828  |
|                            | Caspase 4, apoptosis-related cysteine peptidase                | <i>Casp4</i>   | 12363  | 1.8859  | 0.495906206 |
| Jak-STAT signaling pathway |                                                                |                |        |         | 2.14323E-15 |
|                            | Interleukin 2 receptor, gamma chain                            | <i>Il2rg</i>   | 16186  | 6.8833  | 1.91259E-13 |
|                            | Interleukin 7 receptor                                         | <i>Il7r</i>    | 16197  | 7.9501  | 3.06014E-12 |
|                            | Protein tyrosine phosphatase, non-receptor type 6              | <i>Ptpn6</i>   | 15170  | 3.2050  | 5.88237E-05 |
|                            | Signal transducer and activator of transcription 4             | <i>Stat4</i>   | 20849  | 3.5331  | 0.000984191 |
|                            | Leptin                                                         | <i>Lep</i>     | 16846  | -2.6211 | 0.0010592   |
|                            | Four and a half LIM domains 1                                  | <i>Fhl1</i>    | 14199  | 2.5515  | 0.002097917 |
|                            | Signal transducer and activator of transcription 1             | <i>Stat1</i>   | 20846  | 2.2604  | 0.012104993 |
|                            | Leptin receptor                                                | <i>Lepr</i>    | 16847  | 2.7953  | 0.026147544 |
|                            | Interleukin 22 receptor, alpha 2                               | <i>Il22ra2</i> | 237310 | 2.7092  | 0.066101671 |
|                            | Prolactin receptor                                             | <i>Prlr</i>    | 19116  | -2.4817 | 0.075280525 |
| Primary immunodeficiency   |                                                                |                |        |         | 2.85309E-15 |
|                            | Protein tyrosine phosphatase, receptor type, C                 | <i>Ptprc</i>   | 19264  | 14.9040 | 0           |
|                            | Interleukin 2 receptor, gamma chain                            | <i>Il2rg</i>   | 16186  | 6.8833  | 1.91259E-13 |
|                            | CD4 antigen                                                    | <i>Cd4</i>     | 12504  | 7.5465  | 2.13117E-12 |
|                            | Interleukin 7 receptor                                         | <i>Il7r</i>    | 16197  | 7.9501  | 3.06014E-12 |
|                            | CD79A antigen (immunoglobulin-associated alpha)                | <i>Cd79a</i>   | 12518  | 3.8307  | 6.00136E-06 |
|                            | CD3 antigen, epsilon polypeptide                               | <i>Cd3e</i>    | 12501  | 2.5559  | 0.00337812  |
|                            | CD8 antigen, beta chain 1                                      | <i>Cd8b1</i>   | 12526  | 2.6983  | 0.021186091 |
|                            | Class II transactivator                                        | <i>Ciita</i>   | 12265  | 2.2617  | 0.03868402  |
|                            | Inducible T cell co-stimulator                                 | <i>Icos</i>    | 54167  | 2.4137  | 0.05992872  |
|                            | B cell linker                                                  | <i>Blnk</i>    | 17060  | 2.2740  | 0.07015631  |
| Osteoclast differentiation |                                                                |                |        |         | 5.45511E-15 |
|                            | Leukocyte immunoglobulin-like receptor, subfamily B, member 4A | <i>Lilrb4a</i> | 14728  | 4.0490  | 3.20735E-06 |
|                            | Lymphocyte cytosolic protein 2                                 | <i>Lcp2</i>    | 16822  | 3.0751  | 0.000100617 |
|                            | Phospholipase C, gamma 2                                       | <i>Plcg2</i>   | 234779 | 2.7840  | 0.002576994 |
|                            | Signal transducer and activator of transcription 1             | <i>Stat1</i>   | 20846  | 2.2604  | 0.012104993 |

|                                                                                                       |                 |           |         |             |
|-------------------------------------------------------------------------------------------------------|-----------------|-----------|---------|-------------|
| Spleen tyrosine kinase                                                                                | <i>Syk</i>      | 20963     | 2.3513  | 0.026443134 |
| Neutrophil cytosolic factor 1                                                                         | <i>Ncf1</i>     | 17969     | 2.1895  | 0.050281506 |
| B cell linker                                                                                         | <i>Blnk</i>     | 17060     | 2.2740  | 0.07015631  |
| Fyn proto-oncogene                                                                                    | <i>Fyn</i>      | 14360     | 1.9686  | 0.150106114 |
| Colony stimulating factor 1 receptor                                                                  | <i>Csf1r</i>    | 12978     | 1.8421  | 0.200175322 |
| Transforming growth factor, beta 1                                                                    | <i>Tgfb1</i>    | 21803     | 1.8611  | 0.200327384 |
| Antigen processing and presentation                                                                   |                 |           |         | 7.8513E-15  |
| Cathepsin S                                                                                           | <i>Ctss</i>     | 13040     | 6.2632  | 3.60017E-13 |
| CD4 antigen                                                                                           | <i>Cd4</i>      | 12504     | 7.5465  | 2.13117E-12 |
| Histocompatibility 2, class II antigen E alpha, pseudogene                                            | <i>H2-Ea-ps</i> | 100504404 | 4.9824  | 2.5564E-11  |
| Histocompatibility 2, M region locus 2                                                                | <i>H2-M2</i>    | 14990     | 4.3295  | 1.07827E-05 |
| CD74 antigen (invariant polypeptide of major histocompatibility complex, class II antigen-associated) | <i>Cd74</i>     | 16149     | 2.8270  | 0.000130769 |
| Histocompatibility 2, class II, locus Mb2                                                             | <i>H2-DMb2</i>  | 15000     | 3.1559  | 0.000690586 |
| Interferon gamma inducible protein 30                                                                 | <i>Ifi30</i>    | 65972     | 2.2296  | 0.017229862 |
| CD8 antigen, beta chain 1                                                                             | <i>Cd8b1</i>    | 12526     | 2.6983  | 0.021186091 |
| Class II transactivator                                                                               | <i>Ciita</i>    | 12265     | 2.2617  | 0.03868402  |
| CD8 antigen, alpha chain                                                                              | <i>Cd8a</i>     | 12525     | 2.3514  | 0.112888245 |
| Th1 and Th2 cell differentiation                                                                      |                 |           |         | 3.51751E-13 |
| CD3 antigen, gamma polypeptide                                                                        | <i>Cd3g</i>     | 12502     | 12.8406 | 0           |
| Interleukin 2 receptor, gamma chain                                                                   | <i>Il2rg</i>    | 16186     | 6.8833  | 1.91259E-13 |
| CD4 antigen                                                                                           | <i>Cd4</i>      | 12504     | 7.5465  | 2.13117E-12 |
| Histocompatibility 2, class II antigen E alpha, pseudogene                                            | <i>H2-Ea-ps</i> | 100504404 | 4.9824  | 2.5564E-11  |
| Histocompatibility 2, class II, locus Mb2                                                             | <i>H2-DMb2</i>  | 15000     | 3.1559  | 0.000690586 |
| Signal transducer and activator of transcription 4                                                    | <i>Stat4</i>    | 20849     | 3.5331  | 0.000984191 |
| CD3 antigen, epsilon polypeptide                                                                      | <i>Cd3e</i>     | 12501     | 2.5559  | 0.00337812  |
| Signal transducer and activator of transcription 1                                                    | <i>Stat1</i>    | 20846     | 2.2604  | 0.012104993 |
| Linker for activation of T cells                                                                      | <i>Lat</i>      | 16797     | 1.9337  | 0.216306508 |
| Lymphocyte protein tyrosine kinase                                                                    | <i>Lck</i>      | 16818     | 2.1659  | 0.21930709  |
| Intestinal immune network for IgA production                                                          |                 |           |         | 3.6881E-13  |
| Histocompatibility 2, class II antigen E alpha, pseudogene                                            | <i>H2-Ea-ps</i> | 100504404 | 4.9824  | 2.5564E-11  |
| Histocompatibility 2, class II, locus Mb2                                                             | <i>H2-DMb2</i>  | 15000     | 3.1559  | 0.000690586 |
| Integrin alpha 4                                                                                      | <i>Itga4</i>    | 16401     | 2.5574  | 0.003365085 |
| Chemokine (C-X-C motif) receptor 4                                                                    | <i>Cxcr4</i>    | 12767     | 2.4200  | 0.010165808 |
| Chemokine (C-X-C motif) ligand 12                                                                     | <i>Cxcl12</i>   | 20315     | 2.1346  | 0.02892272  |
| Icos ligand                                                                                           | <i>Icosl</i>    | 50723     | 2.1691  | 0.052602737 |
| Inducible T cell co-stimulator                                                                        | <i>Icos</i>     | 54167     | 2.4137  | 0.05992872  |

|                                                         |                 |        |         |             |
|---------------------------------------------------------|-----------------|--------|---------|-------------|
| Transforming growth factor, beta 1                      | <i>Tgfb1</i>    | 21803  | 1.8611  | 0.200327384 |
| Tumor necrosis factor (ligand) superfamily, member 13b  | <i>Tnfsf13b</i> | 24099  | 1.8448  | 0.419152817 |
| Integrin beta 7                                         | <i>Itgb7</i>    | 16421  | 1.9667  | 0.432113252 |
| Endocytosis                                             |                 |        |         | 3.19463E-12 |
| Interleukin 2 receptor, gamma chain                     | <i>Il2rg</i>    | 16186  | 6.8833  | 1.91259E-13 |
| Histocompatibility 2, M region locus 2                  | <i>H2-M2</i>    | 14990  | 4.3295  | 1.07827E-05 |
| Cytohesin 4                                             | <i>Cyth4</i>    | 72318  | 2.4522  | 0.004929348 |
| Chemokine (C-X-C motif) receptor 4                      | <i>Cxcr4</i>    | 12767  | 2.4200  | 0.010165808 |
| Promyelocytic leukemia                                  | <i>Pml</i>      | 18854  | 2.0533  | 0.092163371 |
| Capping protein (actin filament) muscle Z-line, alpha 1 | <i>Capza1</i>   | 12340  | 1.8703  | 0.175747236 |
| Histocompatibility 2, Q region locus 8                  | <i>H2-Q8</i>    | 15019  | 1.8444  | 0.193624046 |
| Interleukin 2 receptor, beta chain                      | <i>Il2rb</i>    | 16185  | 2.0470  | 0.28469515  |
| Heat shock protein 1-like                               | <i>Hspa11</i>   | 15482  | 1.8149  | 0.338946578 |
| Pleckstrin and Sec7 domain containing 4                 | <i>Psd4</i>     | 215632 | 2.1234  | 0.346751731 |
| Natural killer cell mediated cytotoxicity               |                 |        |         | 5.20152E-12 |
| Protein kinase C, beta                                  | <i>Prkcb</i>    | 18751  | 4.7940  | 8.43315E-08 |
| Integrin beta 2                                         | <i>Itgb2</i>    | 16414  | 3.2753  | 3.75636E-05 |
| Protein tyrosine phosphatase, non-receptor type 6       | <i>Ptpn6</i>    | 15170  | 3.2050  | 5.88237E-05 |
| Lymphocyte cytosolic protein 2                          | <i>Lcp2</i>     | 16822  | 3.0751  | 0.000100617 |
| Integrin alpha L                                        | <i>Itgal</i>    | 16408  | 3.0770  | 0.000441262 |
| RAS-related C3 botulinum substrate 2                    | <i>Rac2</i>     | 19354  | 2.5858  | 0.002214744 |
| PTK2 protein tyrosine kinase 2 beta                     | <i>Ptk2b</i>    | 19229  | 2.7416  | 0.002350974 |
| Phospholipase C, gamma 2                                | <i>Plcg2</i>    | 234779 | 2.7840  | 0.002576994 |
| Vav 1 oncogene                                          | <i>Vav1</i>     | 22324  | 2.8148  | 0.002719009 |
| Spleen tyrosine kinase                                  | <i>Syk</i>      | 20963  | 2.3513  | 0.026443134 |
| MAPK signaling pathway                                  |                 |        |         | 2.13015E-11 |
| Protein kinase C, beta                                  | <i>Prkcb</i>    | 18751  | 4.7940  | 8.43315E-08 |
| RAS-related C3 botulinum substrate 2                    | <i>Rac2</i>     | 19354  | 2.5858  | 0.002214744 |
| Calcium channel, voltage-dependent, gamma subunit 1     | <i>Cacng1</i>   | 12299  | -2.2426 | 0.011240559 |
| RAS related protein 1b                                  | <i>Rap1b</i>    | 215449 | 2.1587  | 0.021951174 |
| TAO kinase 3                                            | <i>Taok3</i>    | 330177 | 2.0617  | 0.091109254 |
| Nuclear receptor subfamily 4, group A, member 1         | <i>Nr4a1</i>    | 15370  | -1.8287 | 0.122795267 |
| RAS-related protein-1a                                  | <i>Rap1a</i>    | 109905 | 1.8729  | 0.13788196  |
| Colony stimulating factor 1 receptor                    | <i>Csflr</i>    | 12978  | 1.8421  | 0.200175322 |
| Transforming growth factor, beta 1                      | <i>Tgfb1</i>    | 21803  | 1.8611  | 0.200327384 |
| Fibroblast growth factor 1                              | <i>Fgfl</i>     | 14164  | 1.8555  | 0.206473803 |
| Toll-like receptor signaling pathway                    |                 |        |         | 2.15417E-11 |
| Chemokine (C-C motif) ligand 5                          | <i>Ccl5</i>     | 20304  | 3.7844  | 4.82844E-07 |

|                                                                          |               |        |         |             |
|--------------------------------------------------------------------------|---------------|--------|---------|-------------|
| Signal transducer and activator of transcription 1                       | <i>Stat1</i>  | 20846  | 2.2604  | 0.012104993 |
| Toll-like receptor 1                                                     | <i>Tlr1</i>   | 21897  | 2.3613  | 0.135077993 |
| Toll-like receptor 7                                                     | <i>Tlr7</i>   | 170743 | 2.2462  | 0.24098673  |
| Thymoma viral proto-oncogene 3                                           | <i>Akt3</i>   | 23797  | 1.7957  | 0.257333103 |
| FBJ osteosarcoma oncogene                                                | <i>Fos</i>    | 14281  | -1.7423 | 0.345977149 |
| Chemokine (C-X-C motif) ligand 9                                         | <i>Cxcl9</i>  | 17329  | 1.6956  | 0.468421758 |
| Lymphocyte antigen 96                                                    | <i>Ly96</i>   | 17087  | 1.8624  | 0.532812844 |
| Caspase 8                                                                | <i>Casp8</i>  | 12370  | 1.6464  | 0.55520391  |
| Mitogen-activated protein kinase kinase 2                                | <i>Map2k2</i> | 26396  | -1.5503 | 0.696438063 |
| Cardiac muscle contraction                                               |               |        |         | 5.07804E-10 |
| Troponin C, cardiac/slow skeletal                                        | <i>Tnnc1</i>  | 21924  | 11.2839 | 0           |
| Myosin, heavy polypeptide 7, cardiac muscle, beta                        | <i>Myh7</i>   | 140781 | 25.3377 | 0           |
| Atpase, Ca <sup>++</sup> transporting, cardiac muscle, slow twitch 2     | <i>Atp2a2</i> | 11938  | 8.3273  | 0           |
| Myosin, light polypeptide 3                                              | <i>Myl3</i>   | 17897  | 5.7018  | 4.96498E-10 |
| Tropomyosin 3, gamma                                                     | <i>Tpm3</i>   | 59069  | 4.0864  | 8.07949E-08 |
| Actin, alpha, cardiac muscle 1                                           | <i>Actc1</i>  | 11464  | -2.7027 | 7.15757E-06 |
| Atpase, Na <sup>+</sup> /K <sup>+</sup> transporting, beta 1 polypeptide | <i>Atp1b1</i> | 11931  | 3.0179  | 1.01881E-05 |
| Calcium channel, voltage-dependent, gamma subunit 1                      | <i>Cacng1</i> | 12299  | -2.2426 | 0.011240559 |
| Tropomyosin 2, beta                                                      | <i>Tpm2</i>   | 22004  | 1.8086  | 0.067947903 |
| Atpase, Na <sup>+</sup> /K <sup>+</sup> transporting, beta 2 polypeptide | <i>Atp1b2</i> | 11932  | -1.7850 | 0.123829945 |
| Adrenergic signaling in cardiomyocytes                                   |               |        |         | 1.10527E-09 |
| Troponin C, cardiac/slow skeletal                                        | <i>Tnnc1</i>  | 21924  | 11.2839 | 0           |
| Myosin, heavy polypeptide 7, cardiac muscle, beta                        | <i>Myh7</i>   | 140781 | 25.3377 | 0           |
| Atpase, Ca <sup>++</sup> transporting, cardiac muscle, slow twitch 2     | <i>Atp2a2</i> | 11938  | 8.3273  | 0           |
| Myosin, light polypeptide 3                                              | <i>Myl3</i>   | 17897  | 5.7018  | 4.96498E-10 |
| Tropomyosin 3, gamma                                                     | <i>Tpm3</i>   | 59069  | 4.0864  | 8.07949E-08 |
| Actin, alpha, cardiac muscle 1                                           | <i>Actc1</i>  | 11464  | -2.7027 | 7.15757E-06 |
| Atpase, Na <sup>+</sup> /K <sup>+</sup> transporting, beta 1 polypeptide | <i>Atp1b1</i> | 11931  | 3.0179  | 1.01881E-05 |
| Calcium channel, voltage-dependent, gamma subunit 1                      | <i>Cacng1</i> | 12299  | -2.2426 | 0.011240559 |
| Tropomyosin 2, beta                                                      | <i>Tpm2</i>   | 22004  | 1.8086  | 0.067947903 |
| Phosphoinositide-3-kinase, catalytic, gamma polypeptide                  | <i>Pik3cg</i> | 30955  | 2.2336  | 0.07771979  |
| Hypertrophic cardiomyopathy (HCM)                                        |               |        |         | 1.25338E-09 |
| Troponin C, cardiac/slow skeletal                                        | <i>Tnnc1</i>  | 21924  | 11.2839 | 0           |
| Myosin, heavy polypeptide 7, cardiac muscle, beta                        | <i>Myh7</i>   | 140781 | 25.3377 | 0           |
| Atpase, Ca <sup>++</sup> transporting, cardiac muscle, slow twitch 2     | <i>Atp2a2</i> | 11938  | 8.3273  | 0           |



|                                                                          |                 |        |         |             |
|--------------------------------------------------------------------------|-----------------|--------|---------|-------------|
| Myosin, light polypeptide 3                                              | <i>Myl3</i>     | 17897  | 5.7018  | 4.96498E-10 |
| Tropomyosin 3, gamma                                                     | <i>Tpm3</i>     | 59069  | 4.0864  | 8.07949E-08 |
| Actin, alpha, cardiac muscle 1                                           | <i>Actc1</i>    | 11464  | -2.7027 | 7.15757E-06 |
| Integrin alpha 4                                                         | <i>Itga4</i>    | 16401  | 2.5574  | 0.003365085 |
| Protein kinase, AMP-activated, gamma 3 non-catalytic subunit             | <i>Prkag3</i>   | 241113 | -2.3624 | 0.005895163 |
| Calcium channel, voltage-dependent, gamma subunit 1                      | <i>Cacng1</i>   | 12299  | -2.2426 | 0.011240559 |
| Tropomyosin 2, beta                                                      | <i>Tpm2</i>     | 22004  | 1.8086  | 0.067947903 |
| cAMP signaling pathway                                                   |                 |        |         | 3.53222E-09 |
| ATPase, Ca <sup>++</sup> transporting, cardiac muscle, slow twitch 2     | <i>Atp2a2</i>   | 11938  | 8.3273  | 0           |
| ATPase, Na <sup>+</sup> /K <sup>+</sup> transporting, beta 1 polypeptide | <i>Atp1b1</i>   | 11931  | 3.0179  | 1.01881E-05 |
| RAS-related C3 botulinum substrate 2                                     | <i>Rac2</i>     | 19354  | 2.5858  | 0.002214744 |
| Vav 1 oncogene                                                           | <i>Vav1</i>     | 22324  | 2.8148  | 0.002719009 |
| Rho-associated coiled-coil containing protein kinase 1                   | <i>Rock1</i>    | 19877  | 2.3129  | 0.0088963   |
| Coagulation factor II (thrombin) receptor                                | <i>F2r</i>      | 14062  | 2.2565  | 0.020547361 |
| RAS related protein 1b                                                   | <i>Rap1b</i>    | 215449 | 2.1587  | 0.021951174 |
| Thyroid stimulating hormone receptor                                     | <i>Tshr</i>     | 22095  | -2.2073 | 0.038586986 |
| ATPase, Na <sup>+</sup> /K <sup>+</sup> transporting, beta 2 polypeptide | <i>Atp1b2</i>   | 11932  | -1.7850 | 0.123829945 |
| RAS-related protein-1a                                                   | <i>Rap1a</i>    | 109905 | 1.8729  | 0.13788196  |
| TNF signaling pathway                                                    |                 |        |         | 3.27002E-08 |
| Chemokine (C-C motif) ligand 5                                           | <i>Ccl5</i>     | 20304  | 3.7844  | 4.82844E-07 |
| Vascular cell adhesion molecule 1                                        | <i>Vcam1</i>    | 22329  | 2.2056  | 0.034362706 |
| Baculoviral IAP repeat-containing 3                                      | <i>Birc3</i>    | 11796  | 1.9096  | 0.14727599  |
| TNF receptor-associated factor 1                                         | <i>Traf1</i>    | 22029  | 2.0830  | 0.20412442  |
| Thymoma viral proto-oncogene 3                                           | <i>Akt3</i>     | 23797  | 1.7957  | 0.257333103 |
| FBJ osteosarcoma oncogene                                                | <i>Fos</i>      | 14281  | -1.7423 | 0.345977149 |
| Tumor necrosis factor receptor superfamily, member 1b                    | <i>Tnfrsf1b</i> | 21938  | 1.7873  | 0.439799373 |
| Interleukin 18 receptor 1                                                | <i>Il18r1</i>   | 16182  | 2.0032  | 0.454499375 |
| Caspase 3                                                                | <i>Casp3</i>    | 12367  | 1.8752  | 0.467106772 |
| Baculoviral IAP repeat-containing 2                                      | <i>Birc2</i>    | 11797  | 1.6539  | 0.47899828  |
| Calcium signaling pathway                                                |                 |        |         | 0.00059103  |
| Troponin C, cardiac/slow skeletal                                        | <i>Tnnc1</i>    | 21924  | 11.2839 | 0           |
| ATPase, Ca <sup>++</sup> transporting, cardiac muscle, slow twitch 2     | <i>Atp2a2</i>   | 11938  | 8.3273  | 0           |
| Protein kinase C, beta                                                   | <i>Prkcb</i>    | 18751  | 4.7940  | 8.43315E-08 |
| PTK2 protein tyrosine kinase 2 beta                                      | <i>Ptk2b</i>    | 19229  | 2.7416  | 0.002350974 |
| Phospholipase C, gamma 2                                                 | <i>Plcg2</i>    | 234779 | 2.7840  | 0.002576994 |
| Coagulation factor II (thrombin) receptor                                | <i>F2r</i>      | 14062  | 2.2565  | 0.020547361 |
| Adrenergic receptor, beta 3                                              | <i>Adrb3</i>    | 11556  | -2.0731 | 0.136087707 |

|                                  |                |       |         |             |
|----------------------------------|----------------|-------|---------|-------------|
| Phospholipase C, delta 4         | <i>Plcd4</i>   | 18802 | -1.8712 | 0.149640841 |
| Phosphorylase kinase gamma 1     | <i>Phkg1</i>   | 18682 | -1.5328 | 0.544630124 |
| Cysteinyl leukotriene receptor 1 | <i>Cysl1r1</i> | 58861 | 1.6576  | 0.904170421 |

---

NF, nuclear factor; PI3K, phosphoinositide-3-kinase; NOD, nucleotide-binding oligomerization domain; Jak-STAT, Janus kinase-signal transducers and activators of transcription; IgA, immunoglobulin A; MAPK, mitogen-activated protein kinase; TNF, tumor necrosis factor.
