# Supplementary material for: Profiling of remote skeletal muscle gene changes resulting from stimulation of atopic dermatitis disease in NC/Nga mouse model
Source: PubMed Central journal article supplement — Korean J Physiol Pharmacol. 2019 Aug 26;23(5):367–79. doi: 10.4196/kjpp.2019.23.5.367 (PMC6717787; doi:10.4196/kjpp.2019.23.5.367), 2019-08-26
Supplement: kjpp-23-367-s003.pdf [file kjpp-23-367-s003.pdf]

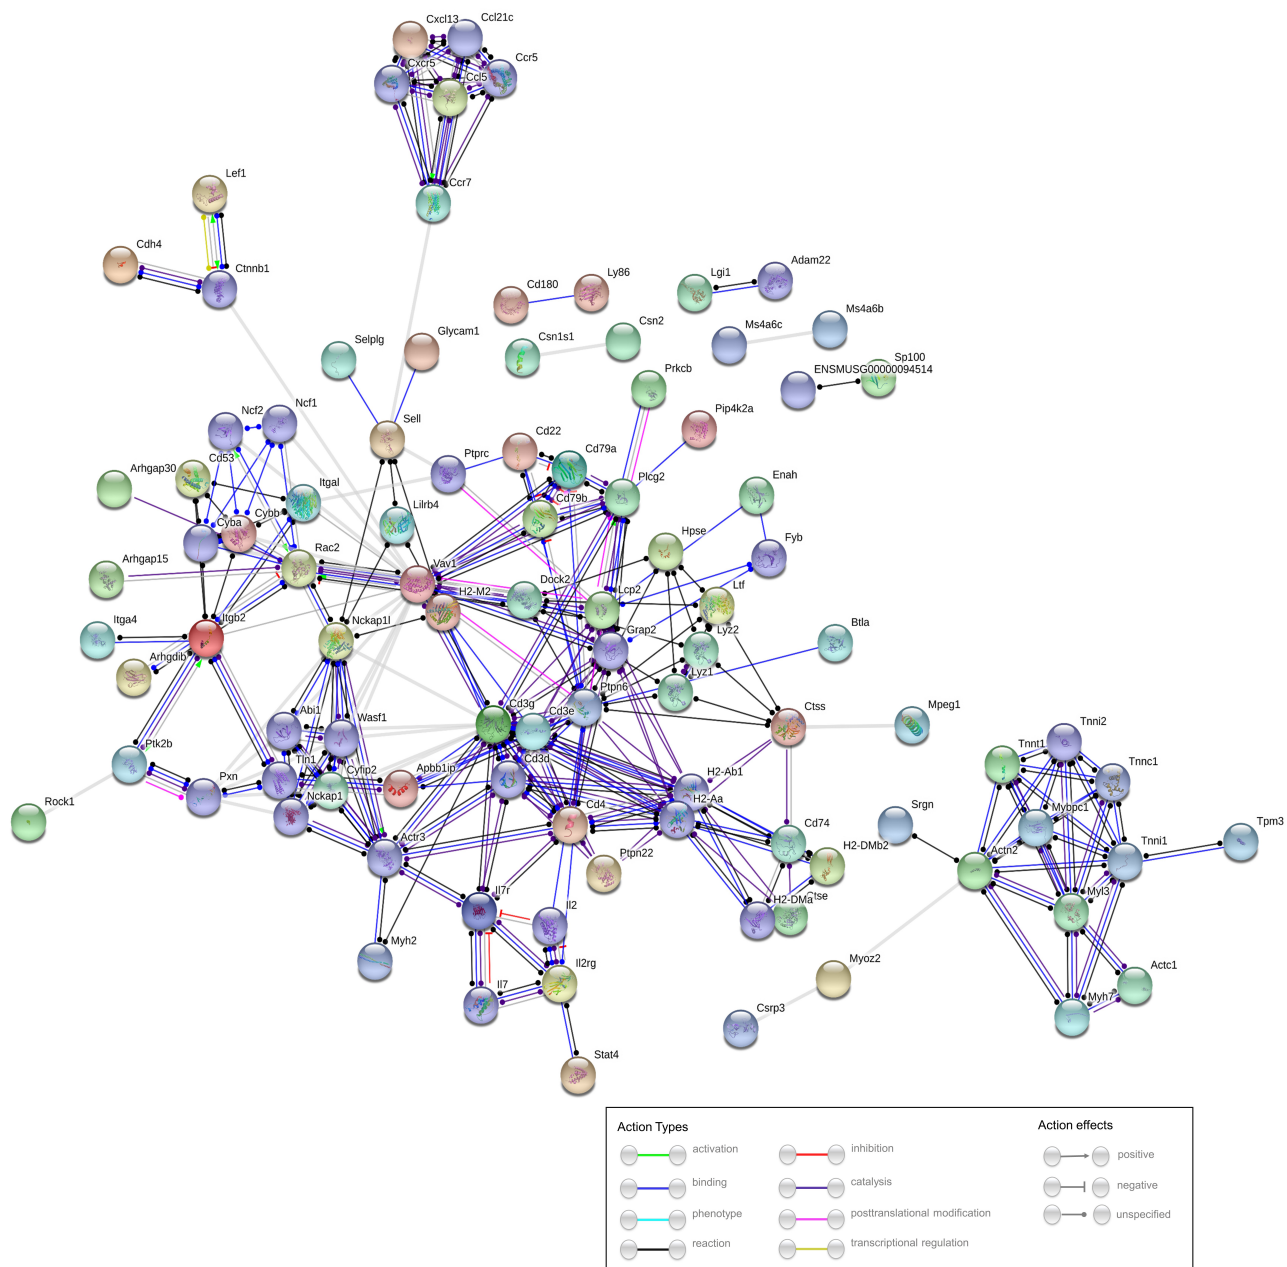

**Supplementary Fig. 1. Protein-protein interaction network analysis of differentially expressed genes (DEGs) by house dust mite-induced atopy dermatitis-like.** Protein interaction network was identified for 98 DEGs obtained from microarray analysis results via Search Tool for the Retrieval of Interacting Genes version 10.5 (<http://www.string-db.org/>).
